# Supplementary material for: Research and Clinical Landscape of Bispecific Antibodies for the Treatment of Solid Malignancies
Source: MDPI journal article supplement (doi:10.3390/ph14090884), 2021-08-31
Supplement: s1 [file s1]

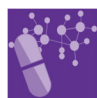

Supplementary Materials

# Research and Clinical Landscape of Bispecific Antibodies for the Treatment of Solid Malignancies

Gabriele Antonarelli <sup>1,2</sup>, Federica Giugliano <sup>1,2</sup>, Chiara Corti <sup>1,2</sup>, Matteo Repetto <sup>1,2</sup>, Paolo Tarantino <sup>1,2</sup> and Giuseppe Curigliano <sup>1,2\*</sup>

<sup>1</sup> Division of Early Drug Development for Innovative Therapy, European Institute of Oncology, IRCCS, 20141 Milan, Italy; gabriele.antonarelli@ieo.it (G.A.); federica.giugliano@ieo.it (F.G.); chiara.corti@ieo.it (C.C.); matteo.repetto@ieo.it (M.R.); paolo.tarantino@ieo.it (P.T.)

<sup>2</sup> Department of Oncology and Haematology (DIPO), University of Milan, 20122 Milan, Italy

\* Correspondence: giuseppe.curigliano@ieo.it; Tel.: +39-0257489599

**Citation:** Antonarelli, G.; Giugliano, F.; Corti, C.; Repetto, M.; Tarantino, P.; Curigliano, G. Research and Clinical Landscape of Bispecific Antibodies for the Treatment of Solid Malignancies. *Pharmaceuticals* **2021**, *14*, 884.  
<https://doi.org/10.3390/ph14090884>

Academic Editors: Yoshikatsu Koga, Hiroki Takashima and Shigehiro Koganemaru

Received: 23 July 2021

Accepted: 29 August 2021

Published: 31 August 2021

**Publisher's Note:** MDPI stays neutral with regard to jurisdictional claims in published maps and institutional affiliations.

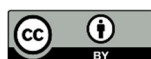

**Copyright:** © 2021 by the authors. Submitted for possible open access publication under the terms and conditions of the Creative Commons Attribution (CC BY) license (<http://creativecommons.org/licenses/by/4.0/>).

|                           | FC<br>func-<br>tion<br>pre-<br>sent/ab-<br>sent | COMBO<br>: 0; 1=<br>IO 2 =<br>other; 3<br>= IO+othe<br>r | MOA<br>1=<br>ICE; 2<br>=<br>TAA;<br>3 =<br>ICI; 4<br>=<br>ADC | Target<br>1 | Target 2 | NCT Num-<br>ber | Title                                                                                                                                   | Status                  | Conditions                                                                                          | Sponsor/Col-<br>laborators       | Phases          | En-<br>roll-<br>ment | Platform  |
|---------------------------|-------------------------------------------------|----------------------------------------------------------|---------------------------------------------------------------|-------------|----------|-----------------|-----------------------------------------------------------------------------------------------------------------------------------------|-------------------------|-----------------------------------------------------------------------------------------------------|----------------------------------|-----------------|----------------------|-----------|
| LY3434172                 | 0                                               | 0                                                        | 3                                                             | PD1         | PDL1     | NCT03936959     | A Study of LY3434172, a PD-1 and PD-L1 Bispecific Antibody, in Advanced Cancer                                                          | Active, not re-cruiting | Advanced Cancer                                                                                     | Eli Lilly and Company            | Phase 1         | 40                   | KIH       |
| LY3415244                 | na                                              | 0                                                        | 3                                                             | PDL1        | TIM3     | NCT03752177     | A Study of LY3415244 in Participants With Advanced Solid Tumors                                                                         | Terminated              | Solid Tumor                                                                                         | Eli Lilly and Company            | Phase 1         | 12                   | na        |
| LY3164530                 | 1                                               | 0                                                        | 2                                                             | EGFR        | MET      | NCT02221882     | A Study of LY3164530 in Participants With Cancer                                                                                        | Completed               | Neo-plasms Neo-plasm Me-tastasis                                                                    | Eli Lilly and Company            | Phase 1         | 29                   | na        |
| Ze-nocutuzumab (MCLA-128) | 1                                               | 0                                                        | 2                                                             | HER2        | HER3     | NCT04100694     | Early Access Program Providing HER2/HER3 Bispecific Anti-body, MCLA-128, for a Pa-tient With Ad-vanced NRG1-Fusion Positive Solid Tumor | Availa-ble              | NRG1 NRG1 Fu-sion Pancre-atic Can-cer Non Small Cell Lung Can-cer Solid Tu-mor, Un-specified, Adult | Merus N.V.                       |                 |                      | DEEK      |
|                           |                                                 |                                                          |                                                               |             |          | NCT02912949     | A Study of Ze-nocutuzumab (MCLA-128) in Patients With Solid Tumors Harboring an NRG1 Fusion                                             | Re-cruiting             | NRG1 Fu-sion NSCLC Harboring NRG1 Fu-sion Pancre-atic Cancer Harboring NRG1 Fu-sion NRG1 Fusion     |                                  |                 |                      |           |
|                           |                                                 |                                                          |                                                               |             |          | NCT03321981     | MCLA-128 With Trastuzumab/C hemotherapy in HER2+ and With Endocrine Therapy in ER+ and Low HER2 Breast Cancer                           | Active, not re-cruiting | Breast Can-cer Meta-static                                                                          |                                  |                 |                      |           |
|                           |                                                 |                                                          |                                                               |             |          | NCT04930432     | Study of MCLA-129, a Human Bispecific EGFR and cMet                                                                                     | Not yet re-cruiting     | Solid Tumor, Non-Small Cell Lung Cancer, Head and                                                   |                                  |                 |                      |           |
| MCLA-129                  | 1                                               | 0                                                        | 2                                                             | EGFR        | MET      | NCT04930432     | Study of MCLA-129, a Human Bispecific EGFR and cMet                                                                                     | Not yet re-cruiting     | Solid Tumor, Non-Small Cell Lung Cancer, Head and                                                   | Betta Pharma-ceuticals Co., Ltd. | Phase 1 Phase 2 | 400                  | Biclonics |

|                     |   |   |   |      |       |  |  |  |  |                                                                                                                                                     |                                                                                                                                                                |                    |                                                                                       |                                                                                                     |                 |     |           |
|---------------------|---|---|---|------|-------|--|--|--|--|-----------------------------------------------------------------------------------------------------------------------------------------------------|----------------------------------------------------------------------------------------------------------------------------------------------------------------|--------------------|---------------------------------------------------------------------------------------|-----------------------------------------------------------------------------------------------------|-----------------|-----|-----------|
|                     |   |   |   |      |       |  |  |  |  | Antibody, in Patients With Advanced NSCLC and Other Solid Tumors                                                                                    | Neck Cancer, Colorectal Cancer                                                                                                                                 |                    |                                                                                       |                                                                                                     |                 |     |           |
|                     |   |   |   |      |       |  |  |  |  | A Phase 1/2 Study Evaluating MCLA-129, a Human Anti-EGFR and Anti-c-MET Bispecific Antibody, in Patients With Advanced NSCLC and Other Solid Tumors | Non-Small Cell Lung Cancer Metastatic Gastric Cancer Head and Neck Cancer                                                                                      | Merus N.V.         | Phase 1 Phase 2                                                                       | 150                                                                                                 |                 |     |           |
|                     |   | 0 |   |      |       |  |  |  |  | NCT04868877                                                                                                                                         |                                                                                                                                                                |                    |                                                                                       |                                                                                                     |                 |     |           |
|                     |   |   |   |      |       |  |  |  |  |                                                                                                                                                     |                                                                                                                                                                |                    |                                                                                       |                                                                                                     |                 |     |           |
| MCLA-145            | 1 | 0 | 3 | PDL1 | 41BB  |  |  |  |  | NCT03922204                                                                                                                                         | A Study of Bispecific Antibody MCLA-145 in Patients With Advanced or Metastatic Malignancies                                                                   | Re-cruiting        | Advanced Cancer Solid Tumor, Adult B-cell Lymphoma, Adult                             | Merus N.V. Incyte Corporation                                                                       | Phase 1         | 118 | Biclonics |
|                     |   |   |   |      |       |  |  |  |  |                                                                                                                                                     |                                                                                                                                                                |                    |                                                                                       |                                                                                                     |                 |     |           |
| MCLA-158            | 1 | 0 | 2 | EGFR | LGR5  |  |  |  |  | NCT03526835                                                                                                                                         | A Study of Bispecific Antibody MCLA-158 in Patients With Advanced Solid Tumors                                                                                 | Unknown status     | Advanced/Metastatic Solid Tumors Colorectal Cancer                                    | Merus N.V. Chiltern International Inc. Q2 Solutions Oncology Therapeutic Development (OTD) 4Clinics | Phase 1         | 120 | Biclonics |
|                     |   |   |   |      |       |  |  |  |  |                                                                                                                                                     |                                                                                                                                                                |                    |                                                                                       |                                                                                                     |                 |     |           |
|                     |   | 0 |   |      |       |  |  |  |  | NCT04172454                                                                                                                                         | Safety and Efficacy of AK104, a PD-1/CTLA-4 Bispecific Antibody, in Selected Advanced Solid Tumors                                                             | Not yet recruiting | Advanced Solid Tumors Melanoma                                                        | Akeso Akeso Pharmaceuticals, Inc.                                                                   | Phase 1 Phase 2 | 120 |           |
|                     |   |   |   |      |       |  |  |  |  |                                                                                                                                                     |                                                                                                                                                                |                    |                                                                                       |                                                                                                     |                 |     |           |
| Cadonilimab (AK104) | 1 | 2 | 3 | PD1  | CTLA4 |  |  |  |  | NCT03852251                                                                                                                                         | A Study of AK104, a PD-1/CTLA-4 Bispecific Antibody, for Advanced Solid Tumors or With mXELOX as First-line Therapy for Advanced Gastric or GEJ Adenocarcinoma | Unknown status     | Gastric Adenocarcinoma Advanced Solid Tumors Gastroesophageal Junction Adenocarcinoma | Akeso Akeso Pharmaceuticals, Inc.                                                                   | Phase 1 Phase 2 | 112 | ITab      |
|                     |   |   |   |      |       |  |  |  |  |                                                                                                                                                     |                                                                                                                                                                |                    |                                                                                       |                                                                                                     |                 |     |           |
|                     |   | 0 |   |      |       |  |  |  |  | NCT04556253                                                                                                                                         | AK104 in Locally Advanced MSI-H/dMMR Gastric Carcinoma and Colorectal Cancer                                                                                   | Not yet recruiting | MSI-H/dMMR Gastric Carcinoma and Colorectal Cancer                                    | Peking University                                                                                   | Phase 2         | 29  |           |
|                     |   |   |   |      |       |  |  |  |  |                                                                                                                                                     |                                                                                                                                                                |                    |                                                                                       |                                                                                                     |                 |     |           |
|                     |   | 0 |   |      |       |  |  |  |  | NCT04380805                                                                                                                                         | A Study of AK104, a PD-1/CTLA-4                                                                                                                                | Re-cruiting        | Recurrent Cervical                                                                    | Akeso Akeso-bio Australia Pty Ltd                                                                   | Phase 2         | 40  |           |

|   |             |                                                                                                                  |                      |                                               |                                        |                   |     |
|---|-------------|------------------------------------------------------------------------------------------------------------------|----------------------|-----------------------------------------------|----------------------------------------|-------------------|-----|
|   |             | Bispecific Anti-body in Sub-jects With Re-current/Meta-static Cervical Cancer                                    |                      | Cancer   Met-astatic Cervi-cal Cancer         |                                        |                   |     |
| 0 | NCT04547101 | A Study of AK104 in Sub-jects With Lo-cally Advanced Unresectable or Metastatic MSI-H/dMMR Solid Tumors          | Re-cruit-ing         | MSI-H/dMMR Solid Tumor                        | Akeso   Akeso Pharmaceuticals, Inc.    | Phase 2           | 70  |
| 0 | NCT04220307 | A Study of a PD-1/CTLA-4 Bispecific Anti-body AK104 in Patients With Metastatic Na-sopharyngeal Carcinoma        | Not yet re-cruit-ing | Nasopharyn-geal Carci-noma                    | Akeso   Akeso Pharmaceuticals, Inc.    | Phase 2           | 140 |
| 2 | NCT04868708 | A Study of AK104 an Anti-PD-1 and Anti-CTLA-4 Bispecific Anti-body) in Recur-rent or Meta-static Cervical Cancer | Not yet re-cruit-ing | Recurrent or Metastatic Cervical Cancer       | Akeso                                  | Phase 2           | 60  |
| 2 | NCT04646330 | A Trial of AK104 Plus Anlotinib in NSCLC                                                                         | Not yet re-cruit-ing | NSCLC                                         | Akeso                                  | Phase 1   Phase 2 | 120 |
| 2 | NCT04572152 | A Study of AK119 (Anti-CD73) in Com-bination With AK104 in Sub-jects With Ad-vanced Solid Tumors                 | Not yet re-cruit-ing | Advanced or Metastatic Solid Tu-mors          | Akeso                                  | Phase 1           | 195 |
| 1 | NCT03261011 | Study of the Safety, Pharma-cokinetics, and Antitumor Ac-tivity of AK104 in Subjects With Advanced Solid Tumors  | Un-known status      | Advanced Cancer                               | Akeso   bio Aus-tralia Pty Ltd   Akeso | Phase 1           | 153 |
| 0 | NCT04647344 | A Study of AK104 in Pa-tients With Lo-cally Advanced or Metastatic Non-small Cell Lung Cancer                    | Not yet re-cruit-ing | Lung Cancer Non-Small Cell Stage IIIB/IIIC/IV | Akeso                                  | Phase 1   Phase 2 | 60  |
| 2 | NCT04544644 | A Study of Combination Therapy in NSCLC                                                                          | Not yet re-cruit-ing | Non-small Cell Lung Cancer                    | Chinese PLA General Hospi-tal          | Phase 2           | 30  |

|  |  |  |  |  |  |  |  |                                                                                                                           |             |                    |                                                                                                        |                                     |                   |     |
|--|--|--|--|--|--|--|--|---------------------------------------------------------------------------------------------------------------------------|-------------|--------------------|--------------------------------------------------------------------------------------------------------|-------------------------------------|-------------------|-----|
|  |  |  |  |  |  |  |  | A Study of Anti-PD-1/CTLA-4 Bispecific AK104 Alone or in Combination With Lenvatinib in Advanced Hepatocellular Carcinoma | NCT04728321 | Re-recruiting      | Hepatocellular Carcinoma                                                                               | Akeso   Akeso Pharmaceuticals, Inc. | Phase 2           | 75  |
|  |  |  |  |  |  |  |  | A Study of Anti-PD-1/CTLA-4 Bispecific AK104 Plus Lenvatinib in First-line Advanced Hepatocellular Carcinoma              | NCT04444167 | Re-recruiting      | Hepatocellular Carcinoma                                                                               | Akeso   Akeso Pharmaceuticals, Inc. | Phase 1   Phase 2 | 30  |
|  |  |  |  |  |  |  |  | A Study of AK112, a PD-1/VEGF Bispecific Antibody, for Advanced Solid Tumors                                              | NCT04047290 | Not yet recruiting | Neoplasms Malignant                                                                                    | Akesobio Australia Pty Ltd   Akeso  | Phase 1           | 132 |
|  |  |  |  |  |  |  |  | A Trial of AK112 (PD-1/VEGF Bispecific Antibody) in Patients With NSCLC                                                   | NCT04900363 | Recruiting         | Non-small Cell Lung Cancer                                                                             | Akeso                               | Phase 1   Phase 2 | 360 |
|  |  |  |  |  |  |  |  | A Trial of AK112 (PD1/VEGF Bispecific) in Combination With Chemotherapy in Patients With NSCLC                            | NCT04736823 | Recruiting         | NSCLC                                                                                                  | Akeso                               | Phase 2           | 206 |
|  |  |  |  |  |  |  |  | A Study of AK112, a PD-1/VEGF Bispecific Antibody, for Advanced Solid Tumors                                              | NCT04597541 | Not yet recruiting | Solid Tumor, Adult                                                                                     | Akeso                               | Phase 1   Phase 2 | 264 |
|  |  |  |  |  |  |  |  | Study of AK112 in the Treatment of Advanced Gynecological Tumors                                                          | NCT04870177 | Recruiting         | Gynecologic Cancer   Cancer Metastatic   Ovarian Neoplasms   Cervical Neoplasm   Endometrial Neoplasms | Akeso                               | Phase 2           | 270 |

|                           |   |   |   |     |      |  |             |                                                                                                                          |                |                                                                                                                               |                                                                                                                  |                 |    |               |
|---------------------------|---|---|---|-----|------|--|-------------|--------------------------------------------------------------------------------------------------------------------------|----------------|-------------------------------------------------------------------------------------------------------------------------------|------------------------------------------------------------------------------------------------------------------|-----------------|----|---------------|
| TF2                       | 0 | 2 |   |     |      |  | NCT00895323 | Bispecific Antibody in Finding Tumor Cells in Patients With Colorectal Cancer                                            | Unknown status | Colorectal Cancer                                                                                                             | Garden State Cancer Center at the Center for Molecular Medicine and Immunology   National Cancer Institute (NCI) | Phase 1         | 9  |               |
|                           |   | 2 |   |     |      |  | NCT00860860 | Study of Pretargeted Radioimmunotherapy of a Anti-CEA Bispecific Antibody and Lu177-labeled Peptide in Colorectal Cancer | Completed      | Colorectal Neoplasms                                                                                                          | Radboud University                                                                                               | Phase 1         | 20 |               |
|                           |   | 2 | 4 | CEA | HSG  |  | NCT01730612 | ImmunoTEP au 68-Ga-IMP-288 for Patients With a Recurrence of HER2 Negative Breast Carcinoma Expressing CEA               | Completed      | HER2 Negative Breast Carcinoma Expressing CEA                                                                                 | Nantes University Hospital   Institut National de la Santé et de la Recherche Médicale, France   Gilead Sciences | Phase 1/Phase 2 | 23 | Dock-and-Load |
|                           |   | 2 |   |     |      |  | NCT01273402 | Study of TF2 Carcinoembryonic Antigen (CEA) Antibody in Patients With Metastatic Colorectal Cancer                       | Withdrawn      | Metastatic Colorectal Cancer                                                                                                  | Gilead Sciences   National Cancer Institute (NCI)                                                                | Phase 1         | 0  |               |
|                           |   | 2 |   |     |      |  | NCT01221675 | TF2- Small Cell Lung Cancer Radio Immunotherapy                                                                          | Completed      | Small Cell Lung Cancer   CEA-expressing Non Small Cell Lung Carcinoma (NSCLC)                                                 | Centre René Gauducheau                                                                                           | Phase 1/Phase 2 | 18 |               |
| GEM3PSC A                 | 0 | 0 | 1 | CD3 | PSCA |  | NCT03927573 | Study With Bispecific Antibody Engaging T-cells, in Patients With Progressive Cancer Diseases With Positive PSCA Marker  | Recruiting     | Non-small Cell Lung Cancer   Breast Cancer   Pancreatic Cancer   Prostate Cancer   Renal Cancer   Transitional Cell Carcinoma | GEMoAB Monoclonals GmbH   GCP-Service International Ltd. & Co. KG                                                | Phase 1         | 24 | na            |
| Nivatrotamab (Hu3F8-BsAb) | 1 | 0 | 1 | CD3 | GD2  |  | NCT03860207 | Study of the Safety and Efficacy of Humanized 3F8 Bispecific Antibody (Hu3F8-BsAb) in Patients With                      | Recruiting     | Neuroblastoma   Osteosarcoma   Other Solid Tumor Cancers                                                                      | Y-mAbs Therapeutics                                                                                              | Phase 1/Phase 2 | 30 | Y-mAbs        |

[illegible]

|                                  |   |   |   |     |      |             |                                                                                                                                      |                                                                                                                                                            |             |                                                                                                      |                   |                   |     |  |  |          |          |
|----------------------------------|---|---|---|-----|------|-------------|--------------------------------------------------------------------------------------------------------------------------------------|------------------------------------------------------------------------------------------------------------------------------------------------------------|-------------|------------------------------------------------------------------------------------------------------|-------------------|-------------------|-----|--|--|----------|----------|
|                                  |   |   |   |     |      |             | Efficacy and Safety of Vancuzumab and FOLFOX With Bevacizumab and FOLFOX in Participants With Untreated Metastatic Colorectal Cancer |                                                                                                                                                            |             |                                                                                                      |                   |                   |     |  |  |          |          |
| RO7247669 (RG6139)               | 1 | 2 |   | 3   | PD1  | LAG3        | NCT04524871                                                                                                                          | A Study Evaluating the Efficacy and Safety of Multiple Immunotherapy-Based Treatment Combinations in Patients With Advanced Liver Cancers (Morpheus-Liver) | Re-cruiting | Advanced Liver Cancers                                                                               | Hoffmann-La Roche | Phase 1   Phase 2 | 280 |  |  |          |          |
|                                  |   | 0 |   |     |      |             | NCT04140500                                                                                                                          | Dose Escalation Study of a PD1-LAG3 Bispecific Antibody in Patients With Advanced and/or Metastatic Solid Tumors                                           | Re-cruiting | Solid Tumors   Metastatic Melanoma   Non-small Cell Lung Cancer   Esophageal Squamous Cell Carcinoma | Hoffmann-La Roche | Phase 1           | 320 |  |  | CrossMab |          |
| RO6874813 (RG7386)               | 1 | 0 | 1 | FAP | DR5  | NCT02558140 | A Dose Escalation Study of RO6874813 in Participants With Locally Advanced or Metastatic Solid Tumors                                | Completed                                                                                                                                                  |             |                                                                                                      | Hoffmann-La Roche | Phase 1           | 120 |  |  |          | CrossMab |
| MEHD7945 A (RG7597, Duligotumab) | 1 | 2 |   |     |      | NCT01986166 | A Study of MEHD7945A and Cobimetinib in Patients With Locally Advanced or Metastatic Cancers With Mutant KRAS                        | Completed                                                                                                                                                  | Neoplasms   | Genentech, Inc.                                                                                      | Phase 1           | 23                |     |  |  |          |          |
|                                  |   | 0 |   | 2   | EGFR | HER3        | NCT01207323                                                                                                                          | A Study of the Safety and Pharmacokinetics (PK) of MEHD7945A in Participants With Locally Advanced or Metastatic Epithelial Tumors                         | Completed   | Epithelial Tumors, Malignant                                                                         | Genentech, Inc.   | Phase 1           | 66  |  |  | CrossMab |          |
|                                  |   | 2 |   |     |      |             | NCT01911598                                                                                                                          | A Study of MEHD7945A in Combination With Cisplatin                                                                                                         | Completed   | Head and Neck Cancer                                                                                 | Genentech, Inc.   | Phase 1           | 24  |  |  |          |          |



|                    |   |   |   |     |      |             |                                                                                                                                                                            |             |              |                                                                                                                                                     |                   |                   |          |  |  |  |  |  |  |               |  |
|--------------------|---|---|---|-----|------|-------------|----------------------------------------------------------------------------------------------------------------------------------------------------------------------------|-------------|--------------|-----------------------------------------------------------------------------------------------------------------------------------------------------|-------------------|-------------------|----------|--|--|--|--|--|--|---------------|--|
|                    |   |   |   |     |      |             | and 5-Fluorouracil (5-FU) or Paclitaxel and Carboplatin in Participants With Recurrent/Metastatic Squamous Cell Carcinoma of the Head and Neck (R/M SCCHN)                 |             |              |                                                                                                                                                     |                   |                   |          |  |  |  |  |  |  |               |  |
|                    |   |   |   |     |      |             | Safety and Efficacy Study of MEHD7945A + FOLFIRI Versus Cetuximab + FOLFIRI as Second Line Therapy in Participants With KRAS Wild-Type Metastatic Colorectal Cancer (mCRC) | NCT01652482 | Completed    | Colorectal Cancer                                                                                                                                   | Genentech, Inc.   | Phase 2           | 135      |  |  |  |  |  |  |               |  |
|                    |   |   |   |     |      |             | A Study of MEHD7945A Versus Cetuximab in Patients With Recurrent/Metastatic Squamous Cell Carcinoma of The Head And Neck                                                   | NCT01577173 | Completed    | Head and Neck Cancer                                                                                                                                | Genentech, Inc.   | Phase 2           | 122      |  |  |  |  |  |  |               |  |
|                    |   |   |   |     |      |             | Study Evaluating the Efficacy and Safety of Multiple Immunotherapy-Based Treatments and Combinations in Patients With Urothelial Carcinoma (MORPHEUS-UC)                   | NCT03869190 | Recruiting   | Urothelial Carcinoma Bladder Cancer                                                                                                                 | Hoffmann-La Roche | Phase 1   Phase 2 | 735      |  |  |  |  |  |  |               |  |
| RO7121661 (RG7769) | 1 |   | 3 | PD1 | TIM3 |             | A Dose Escalation and Expansion Study of RO7121661, a PD-1/TIM-3 Bispecific Antibody, in Participants With Advanced and/or Metastatic Solid Tumors                         | NCT03708328 | Recruiting   | Solid Tumors   Metastatic Melanoma   Non-small Cell Lung Cancer (NSCLC)   Small Cell Lung Cancer (SCLC)   Esophageal Squamous Cell Carcinoma (ESCC) | Hoffmann-La Roche | Phase 1           | 280      |  |  |  |  |  |  | Cross-Mab/KIH |  |
| RO6958688 (RG7802, | 1 | 2 | 1 | CD3 | CEA  | NCT02324257 | A Study of RO6958688 in                                                                                                                                                    | Completed   | Solid Tumors | Hoffmann-La Roche                                                                                                                                   | Phase 1           | 149               | CrossMab |  |  |  |  |  |  |               |  |

|                   |   |                 |                                                                                                                                                                                                                                                                                           |                      |                                       |                      |                         |     |
|-------------------|---|-----------------|-------------------------------------------------------------------------------------------------------------------------------------------------------------------------------------------------------------------------------------------------------------------------------------------|----------------------|---------------------------------------|----------------------|-------------------------|-----|
| Cibisa-<br>tamab) |   |                 | Participants<br>With Locally<br>Advanced<br>and/or Meta-<br>static Carci-<br>noembryonic<br>Antigen Posi-<br>tive Solid Tu-<br>mors                                                                                                                                                       |                      |                                       |                      |                         |     |
|                   | 1 | NCT026507<br>13 | A Study of the<br>Safety, Pharma-<br>cokinetics, and<br>Therapeutic Ac-<br>tivity of<br>RO6958688 in<br>Combination<br>With Atezoli-<br>zumab in Par-<br>ticipants With<br>Locally Ad-<br>vanced and/or<br>Metastatic Car-<br>cinoembryonic<br>Antigen (CEA)-<br>Positive Solid<br>Tumors | Com-<br>pleted       | Solid Tu-<br>mors                     | Hoffmann-La<br>Roche | Phase 1                 | 228 |
|                   | 1 | NCT048260<br>03 | Study To Evalu-<br>ate Safety, Phar-<br>macokinetics,<br>Pharmacody-<br>namics, And<br>Preliminary<br>Anti-Tumor Ac-<br>tivity Of<br>RO7122290 In<br>Combination<br>With Cibisa-<br>tamab With<br>Obinutuzumab<br>Pre-Treatment                                                           | Re-<br>cruit-<br>ing | Metastatic<br>Colorectal<br>Cancer    | Hoffmann-La<br>Roche | Phase<br>1   Phase<br>2 | 80  |
|                   | 1 | NCT033376<br>98 | A Study Of<br>Multiple Immu-<br>notherapy-<br>Based Treat-<br>ment Combina-<br>tions In Partici-<br>pants With Met-<br>astatic Non-<br>Small Cell Lung<br>Cancer (Mor-<br>pheus- Non-<br>Small Cell Lung<br>Cancer)                                                                       | Re-<br>cruit-<br>ing | Carcinoma,<br>Non-Small-<br>Cell Lung | Hoffmann-La<br>Roche | Phase<br>1   Phase<br>2 | 380 |
|                   | 1 | NCT038662<br>39 | A Phase Ib<br>Study to Evalu-<br>ate the Safety,<br>Efficacy, and<br>Pharmacokinetic<br>of Cibisa-<br>tamab in Com-<br>bination With<br>Atezolizumab<br>After                                                                                                                             | Re-<br>cruit-<br>ing | Colorectal<br>Cancer                  | Hoffmann-La<br>Roche | Phase 1                 | 46  |

|                       |   |   |   |      |            |             |                                                                                                                                                 |             |                                                                                                                                                                                                                                                                                                                           |                                                                                                             |         |     |          |  |
|-----------------------|---|---|---|------|------------|-------------|-------------------------------------------------------------------------------------------------------------------------------------------------|-------------|---------------------------------------------------------------------------------------------------------------------------------------------------------------------------------------------------------------------------------------------------------------------------------------------------------------------------|-------------------------------------------------------------------------------------------------------------|---------|-----|----------|--|
|                       |   |   |   |      |            |             |                                                                                                                                                 |             |                                                                                                                                                                                                                                                                                                                           | Pretreatment With Obinutuzumab in Participants With Previously Treated Metastatic Colorectal Adenocarcinoma |         |     |          |  |
| RO7121661 + RO7247669 | 1 | 1 | 4 | PD1  | TIM3/LA G3 | NCT04785820 | A Study of RO7121661 and RO7247669 Compared With Nivolumab in Participants With Advanced or Metastatic Squamous Cell Carcinoma of the Esophagus | Re-cruiting | Advanced or Metastatic Esophageal Squamous Cell Carcinoma                                                                                                                                                                                                                                                                 | Hoffmann-La Roche                                                                                           | Phase 2 | 255 | CrossMab |  |
| CDX-527               | 1 | 0 | 3 | PDL1 | CD27       | NCT04440943 | A Study of the PD-L1xCD27 Bispecific Antibody CDX-527 in Patients With Advanced Malignancies                                                    | Re-cruiting | Non-small Cell Lung Cancer   Breast Cancer   Gastric Cancer   Renal Cell Carcinoma   Ovarian Cancer   Primary Peritoneal Carcinoma   Fallopian Tube Cancer   Cholangiocarcinoma   Bladder Urothelial Carcinoma   MSI-H Colorectal Cancer   Esophageal Cancer   Hepatic Cancer   Head and Neck Cancer   Other Solid Tumors | Celldex Therapeutics                                                                                        | Phase 1 | 40  | na       |  |
| SI-B001               | 1 | 0 | 2 | EGFR | HER3       | NCT04603287 | A Study of SI-B001, an EGFR/HER3 Bispecific Antibody, in Locally Advanced or Metastatic Epithelial Tumors                                       | Re-cruiting | Locally Advanced or Metastatic Epithelial Tumor                                                                                                                                                                                                                                                                           | Sichuan Baili Pharmaceutical Co., Ltd.   SyntImmune Inc.                                                    | Phase 1 | 96  | na       |  |

|                    |    |   |   |      |       |             |                                                                                                                                                                                                                     |             |                                                                                                                                  |                                                          |                   |     |           |
|--------------------|----|---|---|------|-------|-------------|---------------------------------------------------------------------------------------------------------------------------------------------------------------------------------------------------------------------|-------------|----------------------------------------------------------------------------------------------------------------------------------|----------------------------------------------------------|-------------------|-----|-----------|
| SI-B003            | na | 0 | 3 | PD1  | CTLA4 | NCT04606472 | A Study of SI-B003, a PD-1/CTLA-4 Bispecific Antibody, in Patients With Advanced Solid Tumors+H27                                                                                                                   | Re-cruiting | Solid Tumor                                                                                                                      | Sichuan Baili Pharmaceutical Co., Ltd.   SystImmune Inc. | Phase 1           | 159 | na        |
|                    |    | 1 |   |      |       | NCT04276493 | Anti-HER2 Bispecific Antibody ZW25 Activity in Combination With Chemotherapy With/Without Tislelizumab                                                                                                              | Re-cruiting | Breast Cancer   Gastric Cancer   Gastroesophageal Junction Cancer                                                                | BeiGene                                                  | Phase 1   Phase 2 | 50  |           |
|                    |    | 0 |   |      |       | NCT04466891 | A Study of ZW25 (Zanidatamab) in Subjects With Advanced or Metastatic HER2-Amplified Biliary Tract Cancers                                                                                                          | Re-cruiting | HER2-amplified Biliary Tract Cancers                                                                                             | Zymeworks Inc.   BeiGene, Ltd.                           | Phase 2           | 100 |           |
|                    |    | 0 |   |      |       | NCT04513665 | ZW25 in Women With Endometrial Cancers                                                                                                                                                                              | Re-cruiting | Endometrial Cancer, Carcinosarcoma                                                                                               | Zymeworks Inc.                                           | Phase 2           | 25  |           |
| ZW25 (Zanidatamab) | 1  |   | 2 | HER2 | HER2  | NCT03929666 | A Safety and Efficacy Study of ZW25 (Zanidatamab) Plus Combination Chemotherapy in HER2-expressing Gastrointestinal Cancers, Including Gastroesophageal Adenocarcinoma, Biliary Tract Cancer, and Colorectal Cancer | Re-cruiting | HER2-expressing Gastrointestinal Cancers, Including Gastroesophageal Adenocarcinoma, Biliary Tract Cancer, and Colorectal Cancer | Zymeworks Inc.                                           | Phase 2           | 362 | Azymetric |
|                    |    | 2 |   |      |       | NCT02892123 | Trial of ZW25 (Zanidatamab) in Patients With Advanced HER2-expressing Cancers                                                                                                                                       | Re-cruiting | HER2-expressing Cancers                                                                                                          | Zymeworks Inc.                                           | Phase 1           | 280 |           |
|                    |    | 2 |   |      |       | NCT04224272 | A Study of ZW25 (Zanidatamab) With Palbociclib Plus Fulvestrant in Patients With HER2+/HR+ Advanced Breast Cancer                                                                                                   | Re-cruiting | HER2+/HR+ Breast Cancer                                                                                                          | Zymeworks Inc.                                           | Phase 2           | 86  |           |

|                       |   |   |   |      |         |             |                                                                                                        |                    |                                                                                                                                                                                              |                                               |     |           |
|-----------------------|---|---|---|------|---------|-------------|--------------------------------------------------------------------------------------------------------|--------------------|----------------------------------------------------------------------------------------------------------------------------------------------------------------------------------------------|-----------------------------------------------|-----|-----------|
| ZW49                  | 1 | 2 | 4 | HER2 | HER2    | NCT03821233 | A Dose Finding Study of ZW49 in Patients With HER2-Positive Cancers                                    | Re-cruiting        | HER2-expressing Cancers                                                                                                                                                                      | Zymeworks Inc. Phase 1                        | 174 | Azymetric |
| TNB-585               | 1 | 0 | 1 | CD3  | PSMA    | NCT04740034 | A Study of TNB-585 in Subjects With Metastatic Castrate-Resistant Prostate Carcinoma                   | Re-cruiting        | Metastatic Castration-resistant Prostate Cancer                                                                                                                                              | Teneobio, Inc. Phase 1                        | 72  | na        |
| rM28                  | 0 | 0 | 1 | CD28 | HMV-MAA | NCT00204594 | Local Treatment of Metastatic Melanoma With Autologous Lymphocytes and the Bispecific Antibody rM28    | Completed          | Malignant Melanoma                                                                                                                                                                           | University Hospital Tuebingen Phase 1/Phase 2 | 1   | na        |
| INBRX-105 (ES101)     | 1 | 0 | 3 | PDL1 | 41BB    | NCT04009460 | A Study of ES101 (PD-L1x4-1BB Bispecific Antibody) in Patients With Advanced Solid Tumors              | Re-cruiting        | Solid Tumors Neoplasms Malignant Tumor                                                                                                                                                       | Elpiscience Bio-pharma, Ltd. Phase 1          | 180 | na        |
|                       |   | 0 |   |      |         | NCT04841538 | A Study of ES101 (PD-L1x4-1BB Bispecific Antibody) in Patients With Advanced Malignant Thoracic Tumors | Not yet recruiting | Thoracic Tumors Non-small Cell Lung Cancer Small Cell Lung Cancer                                                                                                                            | Elpiscience Bio-pharma, Ltd. Phase 1/Phase 2  | 276 |           |
|                       |   | 0 |   |      |         | NCT03809624 | Study of INBRX-105 in Patients With Solid Tumors                                                       | Re-cruiting        | Metastatic Solid Tumors Non-small Cell Lung Cancer Melanoma Head and Neck Squamous Cell Carcinoma Gastric Adenocarcinoma Renal Cell Carcinoma Urothelial Carcinoma Esophageal Adenocarcinoma | Inhibrx, Inc. Phase 1                         | 90  |           |
|                       |   |   |   |      |         |             |                                                                                                        |                    |                                                                                                                                                                                              |                                               |     |           |
|                       |   |   |   |      |         |             |                                                                                                        |                    |                                                                                                                                                                                              |                                               |     |           |
| Catumaxomab (Removab) | 1 | 0 | 1 | CD3  | EpCAM   | NCT00189345 | Randomized, Multicenter, 2-Dose Level. Open-Label, Phase IIa Study With the                            | Completed          | Ovarian Cancer Fallopian Tube                                                                                                                                                                | AGO Study Group Phase 2                       | 44  | Triomab   |

|   |             |                                                                                                                                                                                           |            |                                                                                 |                                                          |     |
|---|-------------|-------------------------------------------------------------------------------------------------------------------------------------------------------------------------------------------|------------|---------------------------------------------------------------------------------|----------------------------------------------------------|-----|
|   |             | Intraperitoneally Infused Trifunctional Bispecific Antibody Removal(TM) (Anti-EpCAM x Anti-CD3) to Select the Better Dose Level in Platinum Refractory Epithelial Ovarian Cancer Patients |            | Neoplasms   Peritoneal Neoplasms                                                |                                                          |     |
| 0 | NCT00464893 | Phase II Study With Catumaxomab in Patients With Gastric Cancer After Neoadjuvant CTx and Curative Resection                                                                              | Completed  | Gastric Cancer   Gastric Adenocarcinoma                                         | Neovii Biotech Phase 2                                   | 70  |
| 0 | NCT00836654 | Study in EpCAM Positive Patients With Symptomatic Malignant Ascites Using Removalab Versus an Untreated Control Group                                                                     | Completed  | EpCam Positive Tumor (e.g. Ovarian, Gastric, Colon, Breast)   Malignant Ascites | Neovii Biotech 2   Phase 3                               | 258 |
| 0 | NCT00352833 | Safety and Efficacy Study With Catumaxomab in Patients After Curative Resection of a Gastric Adenocarcinoma                                                                               | Completed  | Gastric Cancer   Gastric Adenocarcinoma                                         | Neovii Biotech Phase 2                                   | 40  |
| 0 | NCT04819399 | Investigation of Safety and Tolerability of Catumaxomab in Patients With NMIBC                                                                                                            | Recruiting | Urinary Bladder Neoplasms                                                       | Lindis Biotech GmbH Phase 1                              | 30  |
| 0 | NCT00377429 | Safety and Efficacy Study of Catumaxomab to Treat Ovarian Cancer After a Complete Response to Chemotherapy                                                                                | Completed  | Ovarian Cancer                                                                  | Neovii Biotech   Fresenius Biotech North America Phase 2 | 47  |
| 2 | NCT01815528 | Feasibility and Clinical Activity of Initial Intraperitoneal Catumaxomab Followed by Chemotherapy in Patients With                                                                        | Completed  | Recurrent Epithelial Ovarian Cancer                                             | JSehouli   Charite University, Berlin, Germany Phase 2   | 2   |

|   |             |           |                                                                                                                                                                |                                                                                                                                                                                                                                                |                                                                     |         |    |
|---|-------------|-----------|----------------------------------------------------------------------------------------------------------------------------------------------------------------|------------------------------------------------------------------------------------------------------------------------------------------------------------------------------------------------------------------------------------------------|---------------------------------------------------------------------|---------|----|
|   |             |           | Recurrent Ovarian Cancer                                                                                                                                       |                                                                                                                                                                                                                                                |                                                                     |         |    |
|   |             |           | Safety Study of Second Intra-peritoneal (I.P.)                                                                                                                 |                                                                                                                                                                                                                                                |                                                                     |         |    |
| 0 | NCT01065246 | Completed | Infusion Cycle of Catumaxomab in Patients With Malignant Ascites                                                                                               | Malignant Ascites Due to Epithelial Carcinoma                                                                                                                                                                                                  | Neovii Biotech                                                      | Phase 2 | 8  |
|   |             |           | Study of the Trifunctional Antibody Catumaxomab to Treat Recurrent Symptomatic Malignant Ascites                                                               |                                                                                                                                                                                                                                                |                                                                     |         |    |
| 0 | NCT00326885 | Completed |                                                                                                                                                                | Malignant Ascites                                                                                                                                                                                                                              | Neovii Biotech   Fresenius Biotech North America                    | Phase 2 | 32 |
|   |             |           | Catumaxomab as a Consolidation Therapy in Patients With Ovarian Cancer in Second or Third Clinical Disease Remission                                           |                                                                                                                                                                                                                                                |                                                                     |         |    |
| 0 | NCT01246440 | Completed |                                                                                                                                                                | Ovarian Cancer                                                                                                                                                                                                                                 | Grupo Español de Investigación en Cáncer de Ovario   Neovii Biotech | Phase 2 | 39 |
|   |             |           | Catumaxomab for Treatment of Peritoneal Carcinomatosis in Patients With Gastric Adenocarcinomas                                                                | Gastric Adenocarcinoma With Peritoneal Carcinomatosis   Siewert Type II Adenocarcinoma of Esophagogastric Junction With Peritoneal Carcinomatosis   Siewert Type III Adenocarcinoma of Esophagogastric Junction With Peritoneal Carcinomatosis | AIO-Studien-GmbH   Neovii Biotech                                   | Phase 2 | 42 |
|   |             |           | A Open Label, Dose Escalating Study to Evaluate the Safety and Tolerability of Ascending Intravenous (i.v.) Doses of Catumaxomab in Epithelial Cancer Patients | Epithelial Cancer Patients                                                                                                                                                                                                                     | Neovii Biotech                                                      | Phase 1 | 16 |

|   |             |                                                                                                                                                                                                                                             |            |                                                    |                                            |                   |     |
|---|-------------|---------------------------------------------------------------------------------------------------------------------------------------------------------------------------------------------------------------------------------------------|------------|----------------------------------------------------|--------------------------------------------|-------------------|-----|
| 0 | NCT00822809 | CASIMAS: Catumaxomab Safety Phase IIIb Study With Intraperitoneal Infusion in Patients With Malignant Ascites Due to Epithelial Cancers                                                                                                     | Completed  | Cancer   Neoplasms   Carcinoma   Malignant Ascites | Neovii Biotech                             | Phase 3           | 230 |
| 0 | NCT00563836 | Phase II Study of the Trifunctional Antibody Catumaxomab Administered Intra- and Post-operatively in Patients With Ovarian Cancer                                                                                                           | Completed  | Ovarian Cancer   Epithelial Ovarian Cancer         | Neovii Biotech                             | Phase 2           | 41  |
| 0 | NCT01784900 | Treatment of Gastric Peritoneal Carcinomatosis by Association of Complete Surgical Resection of the Lesions and Intraperitoneal Immunotherapy Using Catumaxomab                                                                             | Terminated | Patients With Gastric Peritoneal Carcinomatosis    | Gustave Roussy, Cancer Campus, Grand Paris | Phase 2           | 26  |
| 0 | NCT04222114 | Comparing the Efficacy and Safety of Intraperitoneal Infusion of Catumaxomab and Treatment of Investigator Choice in Patients With Advanced Gastric Carcinoma With Peritoneal Metastasis                                                    | Recruiting | Malignant Ascites   Gastrointestinal Cancers       | LintonPharm Co.,Ltd.                       | Phase 3           | 282 |
| 0 | NCT04799847 | A Multicenter, Non-randomized, Uncontrolled, Open-label Phase I/II Study to Observe the Safety and Preliminary Efficacy of Catumaxomab in Patients With Non-Muscle-Invasive Bladder Cancer Who Have Failed or Are Intolerant to BCG Vaccine | Recruiting | Bladder Cancer                                     | LintonPharm Co.,Ltd.                       | Phase 1   Phase 2 | 167 |



|               |   |   |   |      |            |             |                                                                                                                        |             |                                                                            |                                                      |                 |     |          |
|---------------|---|---|---|------|------------|-------------|------------------------------------------------------------------------------------------------------------------------|-------------|----------------------------------------------------------------------------|------------------------------------------------------|-----------------|-----|----------|
| EMB-01        | 1 | 0 | 2 | EGFR | cMET       | NCT03797391 | A Dose Escalation Study of EMB-01 in Participants With Advanced/Metastatic Solid Tumors                                | Re-cruiting | Neoplasms Neoplasms Metastasis Non-Small-Cell Lung Cancer                  | Shanghai EpimAb Biotherapeutics Co., Ltd. Co-venture | Phase 1 Phase 2 | 73  | FIT-Ig   |
| EMB-02        | 1 | 0 | 3 | PD1  | LAG3       | NCT04618393 | A Study of EMB-02 in Participants With Advanced Solid Tumors                                                           | Re-cruiting | Advanced Solid Tumors                                                      | Shanghai EpimAb Biotherapeutics Co., Ltd.            | Phase 1 Phase 2 | 43  | na       |
| hMN-14 × m734 | 0 | 2 | 4 | CEA  | DTPA       | NCT00467506 | Phase II Two-step Radioimmunotherapy Clinical Study in Medullary Thyroid Carcinoma                                     | Completed   | Thyroid Neoplasms                                                          | Nantes University Hospital                           | Phase 2         |     | na       |
| HX009         | 1 | 0 | 3 | PD1  | CD47       | NCT04097769 | The Safety, Tolerability, and Initial Efficacy of HX009 in Patients With Advanced Malignancies                         | Re-cruiting | Advanced Solid Tumors                                                      | Waterstone Hanxbio Pty Ltd                           | Phase 1         | 37  | na       |
|               |   |   |   |      |            | NCT04886271 | Recombinant Humanized Anti-CD47 / PD-1 Bifunctional Antibody HX009 Injection in the Treatment of Advanced Solid Tumors | Re-cruiting | Advanced Solid Tumor                                                       | Waterstone Hanxbio Pty Ltd                           | Phase 2         | 210 |          |
| FS118         | 0 | 0 | 3 | PDL1 | LAG3       | NCT03440437 | FS118 First in Human Study in Patients With Advanced Malignancies                                                      | Re-cruiting | Advanced Cancer Metastatic Cancer Squamous Cell Carcinoma of Head and Neck | F-star Delta Limited                                 | Phase 1 Phase 2 | 80  | na       |
| FS120         | 0 | 0 | 3 | OX40 | 41BB       | NCT04648202 | FS120 First in Human Study in Patients With Advanced Malignancies                                                      | Re-cruiting | Advanced Cancer Metastatic Cancer                                          | F-star Beta Limited                                  | Phase 1         | 70  | na       |
| FS222         | 1 | 0 | 3 | PDL1 | 41BB       | NCT04740424 | FS222 First in Human Study in Patients With Advanced Malignancies                                                      | Re-cruiting | Advanced Cancer Metastatic Cancer                                          | F-star Beta Limited                                  | Phase 1         | 177 | na       |
| PF-06671008   | 0 | 0 | 1 | CD3  | P-Cadherin | NCT02659631 | PF-06671008 Dose Escalation Study in Advanced Solid Tumors                                                             | Terminated  |                                                                            | Pfizer                                               | Phase 1         | 28  | DART/KIH |
| PF-07062119   | 1 | 1 | 1 | CD3  | GUCY2C     | NCT04171141 | Study to Test the Safety and Tolerability of                                                                           | Re-cruiting | Gastrointestinal Tumors,                                                   | Pfizer                                               | Phase 1         | 130 | na       |

|             |    |   |   |      |       |             |                                                                                                         |                        |                                                                                                                                                                                                                                                                                                                                                                              |                           |                 |     |    |
|-------------|----|---|---|------|-------|-------------|---------------------------------------------------------------------------------------------------------|------------------------|------------------------------------------------------------------------------------------------------------------------------------------------------------------------------------------------------------------------------------------------------------------------------------------------------------------------------------------------------------------------------|---------------------------|-----------------|-----|----|
|             |    |   |   |      |       |             | PF-07062119 in Patients With Selected Advanced or Metastatic Gastrointestinal Tumors                    |                        | Colorectal Adenocarcinomas, Gastric Adenocarcinomas, Esophageal Adenocarcinomas                                                                                                                                                                                                                                                                                              |                           |                 |     |    |
| PF-07257876 | na | 0 | 3 | PDL1 | CD47  | NCT04881045 | Study to Test the Safety and Tolerability of PF-07257876 in Participants With Selected Advanced Tumors. | Not yet recruiting     | Non-Small Cell Lung Cancer Squamous Cell Carcinoma of the Head and Neck Ovarian Cancer                                                                                                                                                                                                                                                                                       | Pfizer                    | Phase 1         | 90  | na |
| AGEN1223    | 1  | 1 | 3 | na   | na    | NCT04156100 | A Study in Subjects With Advanced Solid Tumors                                                          | Active, not recruiting | Advanced Solid Tumor                                                                                                                                                                                                                                                                                                                                                         | Agenus Inc.               | Phase 1         | 82  | na |
| GEN1044     | 1  | 0 | 1 | CD3  | 5T4   | NCT04424641 | A Study on the Safety of GEN1044 (Duo-Body CD3x5T4) in Subjects With Malignant Solid Tumors             | Recruiting             | Dose Escalation Part: Locally Advanced or Metastatic Solid Tumor(s) Expansion Part: Prostate Cancer Expansion Part: Esophageal Cancer Expansion Part: Triple Negative Breast Cancer (TNBC) Expansion Part: Squamous Cell Carcinoma of Head and Neck (SCCHN) Expansion Part: Non-small Cell Lung Cancer (NSCLC) Expansion Part: Bladder Cancer Expansion Part: Uterine Cancer | Genmab AbbVie             | Phase 1 Phase 2 | 378 | na |
| REGN4018    | 1  | 1 | 1 | CD3  | MUC16 | NCT04590326 | Study of REGN5668 Administered in Combination With                                                      | Recruiting             | Ovarian Cancer Fallopian Tube Cancer-Primary                                                                                                                                                                                                                                                                                                                                 | Regeneron Pharmaceuticals | Phase 1 Phase 2 | 290 | na |

|          |   |   |   |      |      |  |             |                                                                                                                                                                                                                                                 |                    |                                                                                                  |                           |                   |     |        |
|----------|---|---|---|------|------|--|-------------|-------------------------------------------------------------------------------------------------------------------------------------------------------------------------------------------------------------------------------------------------|--------------------|--------------------------------------------------------------------------------------------------|---------------------------|-------------------|-----|--------|
|          |   |   |   |      |      |  |             | Cemiplimab or REGN4018 in Adult Women With Recurrent Ovarian Cancer.                                                                                                                                                                            |                    | Peritoneal Cancer                                                                                |                           |                   |     |        |
|          |   |   |   |      |      |  |             | Study of REGN4018 Administered Alone or in Combination With Cemiplimab in Patients With Recurrent Ovarian Cancer                                                                                                                                | Re-cruiting        | Recurrent Ovarian Cancer   Recurrent Fallopian Tube Cancer   Recurrent Primary Peritoneal Cancer | Regeneron Pharmaceuticals | Phase 1   Phase 2 | 392 |        |
|          | 1 |   |   |      |      |  | NCT03564340 |                                                                                                                                                                                                                                                 |                    |                                                                                                  |                           |                   |     |        |
| REGN5093 | 1 | 0 | 1 | MET  | MET  |  | NCT04077099 | REGN5093 in Patients With MET-Altered Advanced Non-Small Cell Lung Cancer                                                                                                                                                                       | Re-cruiting        | NSCLC                                                                                            | Regeneron Pharmaceuticals | Phase 1   Phase 2 | 111 | na     |
| REGN5678 | 1 | 1 | 1 | CD28 | PSMA |  | NCT03972657 | Study of REGN5678 (Anti-PSMAxCD28) With Cemiplimab (Anti-PD-1) in Patients With Metastatic Castration-resistant Prostate Cancer                                                                                                                 | Re-cruiting        | Metastatic Castration-resistant Prostate Cancer                                                  | Regeneron Pharmaceuticals | Phase 1   Phase 2 | 129 | na     |
| REGN7075 | 1 | 1 | 1 | CD28 | EGFR |  | NCT04626635 | REGN7075 in Combination With Cemiplimab in Adult Participants With Advanced Solid Tumors                                                                                                                                                        | Re-cruiting        | Advanced Solid Tumors                                                                            | Regeneron Pharmaceuticals | Phase 1   Phase 2 | 312 | na     |
| ABL503   | 1 | 0 | 3 | PDL1 | 41BB |  | NCT04762641 | This is a Study to Evaluate the Safety and Tolerability of ABL503, and to Determine the Maximum Tolerated Dose (MTD) and Recommended Phase 2 Dose (RP2D) of ABL503 in Subjects With Any Progressive Locally Advanced or Metastatic Solid Tumors | Not yet recruiting | Advanced Solid Tumor                                                                             | ABL Bio, Inc.             | Phase 1           | 36  | na     |
| ERY974   | 1 | 0 | 1 | CD3  | GPC3 |  | NCT02748837 | A Study of ERY974 in Patient With Advanced Solid Tumors                                                                                                                                                                                         | Completed          | Solid Tumors                                                                                     | Chugai Pharmaceutical     | Phase 1           | 29  | ART-Ig |

|                          |   |    |   |      |       |             |                                                                                                                                                                                                                                                                          |                    |                                                                                                |                                                                                                 |                   |     |          |
|--------------------------|---|----|---|------|-------|-------------|--------------------------------------------------------------------------------------------------------------------------------------------------------------------------------------------------------------------------------------------------------------------------|--------------------|------------------------------------------------------------------------------------------------|-------------------------------------------------------------------------------------------------|-------------------|-----|----------|
| M701                     | 1 | 0  | 1 | CD3  | EpCAM | NCT04501744 | A Study of M701 (EpCAM and CD3) in Malignant Ascites                                                                                                                                                                                                                     | Re-cruiting        | Malignant Ascites   Cancer                                                                     | Wuhan YZY Biopharma Co., Ltd.                                                                   | Phase 1           | 42  | na       |
| M802                     | 1 | 0  | 1 | CD3  | HER2  | NCT04501770 | A Study of M802 (HER2 and CD3) in HER2-Positive Advanced Solid Tumors                                                                                                                                                                                                    | Re-cruiting        | HER2-Positive Solid Tumors                                                                     | Wuhan YZY Biopharma Co., Ltd.                                                                   | Phase 1           | 32  | YBODY    |
| M1231                    | 0 | 0  | 4 | EGFR | MUC1  | NCT04695847 | M1231 in Participants With Solid Tumors                                                                                                                                                                                                                                  | Re-cruiting        | Metastatic Solid Tumors   Esophageal Cancer   Non-Small Cell Lung Cancer                       | EMD Serono Research & Development Institute, Inc.   Merck KGaA, Darmstadt, Germany   EMD Serono | Phase 1           | 84  | na       |
| ABL001 (NOV1501) (TR009) | 1 | 0  | 1 | VEGF | DLL4  | NCT03292783 | This is a Study to Evaluate the Safety and Tolerability of the Study Drug ABL001, and to Determine the Maximum Tolerated Dose and/or Recommended Phase 2 Study Dose of ABL001                                                                                            | Re-cruiting        | Advanced Solid Tumors                                                                          | ABL Bio, Inc.   National OncoVenture                                                            | Phase 1           | 39  | IgG-scFv |
|                          |   | 2  |   |      |       | NCT04492033 | This is a Study to Evaluate the Safety and Tolerability of the Study Medication ABL001 in Combination With Irinotecan/Paclitaxel, and to Determine the Maximum Tolerated Dose and/or Recommended Phase 2 Study Dose of ABL001 in Combination With Irinotecan/Paclitaxel. | Re-cruiting        | Advanced Solid Tumors                                                                          | ABL Bio, Inc.   National OncoVenture                                                            | Phase 1   Phase 2 | 18  |          |
|                          |   | na |   |      |       | NCT04900818 | Study of TJ033721 in Subjects With Advanced or Metastatic Solid Tumors                                                                                                                                                                                                   | Not yet recruiting | Solid Tumor   Advanced Cancer   Metastatic Cancer   Gastric Cancer   Gastroesophageal Junction | I-Mab Biopharma Co. Ltd.                                                                        | Phase 1           | 108 |          |

|                  |   |   |   |      |      |             |                                                                                                                                                                                                                                                 |            |                                                   |                                                                          |                   |    |         |
|------------------|---|---|---|------|------|-------------|-------------------------------------------------------------------------------------------------------------------------------------------------------------------------------------------------------------------------------------------------|------------|---------------------------------------------------|--------------------------------------------------------------------------|-------------------|----|---------|
|                  |   |   |   |      |      |             |                                                                                                                                                                                                                                                 |            |                                                   | Carcinoma   Esophageal Adenocarcinoma   Pancreatic Ductal Adenocarcinoma |                   |    |         |
| ABL503 (TJ-CD4B) | 0 | 0 | 3 | PDL1 | 41BB | NCT04762641 | This is a Study to Evaluate the Safety and Tolerability of ABL503, and to Determine the Maximum Tolerated Dose (MTD) and Recommended Phase 2 Dose (RP2D) of ABL503 in Subjects With Any Progressive Locally Advanced or Metastatic Solid Tumors | Recruiting | Advanced Solid Tumors                             | I-Mab Biopharma Co. Ltd.                                                 | Phase 1           | 39 | na      |
| Ertumaxomab      | 0 |   |   |      |      |             | Phase II Study With the Trifunctional Antibody Ertumaxomab to Treat Metastatic Breast Cancer Progressing After Endocrine Treatment                                                                                                              | Terminated | Metastatic Breast Cancer   Advanced Breast Cancer | Neovii Biotech                                                           | Phase 2           | 40 |         |
|                  | 0 |   |   |      |      |             | Safety and Efficacy Study of the Trifunctional Antibody Ertumaxomab to Treat Patients With Advanced or Metastatic Breast Cancer (IV REXBC 02)                                                                                                   | Terminated | Breast Cancer                                     | Neovii Biotech                                                           | Phase 2           | 40 | Triomab |
|                  | 1 |   | 1 | CD3  | HER2 | NCT01569412 | Open Label, Dose Escalating Study With Ertumaxomab In Patients With HER-2/Neu Expressing Advanced Solid Tumors                                                                                                                                  | Terminated | Her2/Neu Positive Advanced Solid Tumors           | Neovii Biotech                                                           | Phase 1   Phase 2 | 14 |         |
|                  | 0 |   |   |      |      |             | Phase II Study With the Trifunctional Antibody Ertumaxomab to Treat Metastatic Breast Cancer After                                                                                                                                              | Terminated | Metastatic Breast Cancer   Advanced Breast Cancer | Neovii Biotech   Fresenius Biotech North America                         | Phase 2           | 19 |         |

|         |   |   |   |      |      |             |                                                                                                                                                                                                                                        |                    |                                            |                                      |         |     |    |
|---------|---|---|---|------|------|-------------|----------------------------------------------------------------------------------------------------------------------------------------------------------------------------------------------------------------------------------------|--------------------|--------------------------------------------|--------------------------------------|---------|-----|----|
|         |   |   |   |      |      |             | Progression on Trastuzumab Therapy                                                                                                                                                                                                     |                    |                                            |                                      |         |     |    |
| GS-1423 | 1 | 2 | 3 | CD73 | TGFb | NCT03954704 | Study of GS-1423 in Participants With Advanced Solid Tumors                                                                                                                                                                            | Terminated         | Advanced Solid Tumors                      | Gilead Sciences                      | Phase 1 | 22  | na |
| IBI315  | 1 | 0 | 1 | PD1  | HER2 | NCT041627   | A Phase Ia/Ib Study of IBI315 in Patients With HER2-expressing Advanced Solid Tumor                                                                                                                                                    | Re-cruiting        | Advanced Solid Tumor                       | Innovent Biologics (Suzhou) Co. Ltd. | Phase 1 | 191 | na |
|         |   | 2 |   |      |      | NCT04672928 | A Clinical Study to Evaluate the Efficacy and Safety of IBI318 in Combination With Paclitaxel Versus Placebo in Combination With Paclitaxel in Patients With Small Cell Lung Cancer Who Have Failed First-line or Above Chemotherapies | Re-cruiting        | Small Cell Lung Carcinoma                  | Innovent Biologics (Suzhou) Co. Ltd. | Phase 1 | 20  |    |
|         |   | 0 |   |      |      | NCT04611321 | Study of IBI318 in Patients With Advanced Cutaneous Squamous Cell Carcinoma                                                                                                                                                            | Re-cruiting        | Advanced Cutaneous Squamous Cell Carcinoma | Innovent Biologics (Suzhou) Co. Ltd. | Phase 1 | 56  |    |
| IBI318  | 1 |   | 3 | PD1  | PDL1 | NCT04635527 | A Study on the Safety and Effectiveness of IBI318 Combined With Conventional TACE (cTACE) as a Perioperative Treatment for Potentially Resected Hepatocellular Carcinoma                                                               | Not yet recruiting | Hepatocellular Carcinoma                   | Innovent Biologics (Suzhou) Co. Ltd. | Phase 1 | 20  | na |
|         |   | 0 |   |      |      | NCT03875157 | Study of IBI318 in Participants With Advanced Malignancies                                                                                                                                                                             | Re-cruiting        | Advanced Malignancies                      | Innovent Biologics (Suzhou) Co. Ltd. | Phase 1 | 327 |    |
|         |   | 2 |   |      |      | NCT04777084 | The Efficacy and Safety of the Bispecific Anti-PD-1/PD-L1 Antibody IBI318 Combined With Lenvatinib in NSCLC.                                                                                                                           | Re-cruiting        | Non-Small Cell Lung Cancer                 | Hunan Province Tumor Hospital        | Phase 2 | 30  |    |

|        |   |   |   |      |      |             |                                                                                                                                  |                    |                                                          |                                                                   |                   |     |      |
|--------|---|---|---|------|------|-------------|----------------------------------------------------------------------------------------------------------------------------------|--------------------|----------------------------------------------------------|-------------------------------------------------------------------|-------------------|-----|------|
| IBI322 | 1 | 0 | 3 | PDL1 | CD47 | NCT04912466 | IBI322 Monotherapy or Combination Therapy in Subjects With Advanced Malignant Tumors.                                            | Not yet recruiting | Advanced Solid Tumor                                     | Innovent Biologics (Suzhou) Co. Ltd.                              | Phase 1           | 36  | na   |
|        |   | 0 |   |      |      | NCT04338659 | Safety and Efficacy of IBI322 in American Subjects With Advanced Malignant Tumors                                                | Not yet recruiting | Advanced Malignancies                                    | Innovent Biologics (Suzhou) Co. Ltd.                              | Phase 1           | 45  |      |
|        |   | 0 |   |      |      | NCT04328831 | Safety and Efficacy of IBI322 in Chinese Subjects With Advanced Malignant Tumors                                                 | Re-recruiting      | Advanced Malignancies                                    | Innovent Biologics (Suzhou) Co. Ltd.                              | Phase 1           | 218 |      |
| CC-1   | 1 | 2 | 1 | CD3  | PSMA | NCT04496674 | Bispecific PSMAxCD3 Antibody CC-1 in Patients With Squamous Cell Carcinoma of the Lung                                           | Not yet recruiting | Lung Cancer Squamous Cell                                | German Cancer Research Center   University Hospital Tuebingen     | Phase 1           | 86  | na   |
|        |   | 0 |   |      |      | NCT04104607 | the Bispecific PSMAxCD3 Antibody CC-1 in Patients With Castration Resistant Prostate Carcinoma                                   | Re-recruiting      | Castration-Resistant Prostatic Cancer                    | University Hospital Tuebingen   German Cancer Research Center     | Phase 1           | 86  |      |
| KN026  | 1 | 0 | 2 | HER2 | HER2 | NCT04521179 | Study of KN026 Combined With KN046 in Patients With Locally Advanced HER2-positive Solid Tumors                                  | Re-recruiting      | HER2-positive Solid Tumors                               | Jiangsu Al-Phamab Biopharmaceuticals Co., Ltd   Peking University | Phase 2           | 30  | CRIB |
|        |   | 2 |   |      |      | NCT04778982 | Study of KN026 in Combination With Palbociclib With or Without Fulvestrant in Patients With Advanced HER2-positive Breast Cancer | Not yet recruiting | HER2-positive Metastatic Breast Cancer                   | Jiangsu Al-Phamab Biopharmaceuticals Co., Ltd                     | Phase 1   Phase 2 | 66  |      |
|        |   | 0 |   |      |      | NCT03847168 | KN026 in Patients With HER2 Expressing Breast Cancer and Gastric Cancer                                                          | Re-recruiting      | Breast Cancer   Gastric/Gastroesophageal Junction Cancer | Jiangsu Al-Phamab Biopharmaceuticals Co., Ltd                     | Phase 1           | 20  |      |
|        |   | 0 |   |      |      | NCT03925974 | KN026 in Patients With HER2 Expressing Gastric/Gastroesophageal Junction Cancer                                                  | Re-recruiting      | Gastric/Gastroesophageal Junction Cancer                 | Jiangsu Al-Phamab Biopharmaceuticals Co., Ltd                     | Phase 2           | 50  |      |





[illegible]

|                          |    |   |   |      |              |  |             |                                                                                                                              |                    |                                                                                                                                                                                                                                                                                                                          |                                                                    |                   |     |         |
|--------------------------|----|---|---|------|--------------|--|-------------|------------------------------------------------------------------------------------------------------------------------------|--------------------|--------------------------------------------------------------------------------------------------------------------------------------------------------------------------------------------------------------------------------------------------------------------------------------------------------------------------|--------------------------------------------------------------------|-------------------|-----|---------|
|                          |    | 1 |   |      |              |  | NCT04040699 | KN026 Combined With KN046 in Subjects With HER2 Positive Solid Tumor                                                         | Re-cruiting        | HER2 Positive Solid Tumor                                                                                                                                                                                                                                                                                                | Peking University   Jiangsu Al-phamab Bio-pharmaceuticals Co., Ltd | Phase 1           | 24  |         |
| Q-1802                   | na | 0 | 1 | PDL1 | Claudin 18.2 |  | NCT04856150 | A Study of Q-1802 in Patients With Advanced Solid Tumors                                                                     | Not yet recruiting | Advanced Solid Tumors                                                                                                                                                                                                                                                                                                    | QureBio Ltd.                                                       | Phase 1           | 66  | na      |
| APVO414 (ES414) (MOR209) | 1  | 0 | 1 | CD3  | PSMA         |  | NCT02262910 | Study of ES414 in Metastatic Castration-Resistant Prostate Cancer                                                            | Completed          | Prostate Cancer                                                                                                                                                                                                                                                                                                          | Aptevo Therapeutics                                                | Phase 1           | 35  | ADAPTIR |
|                          |    | 0 |   |      |              |  | NCT03411915 | A Study of XmAb18087 in Subjects With NET and GIST                                                                           | Re-cruiting        | Neuroendocrine Tumor   Gastro-intestinal Neoplasm                                                                                                                                                                                                                                                                        | Xencor, Inc.   ICON plc                                            | Phase 1           | 87  |         |
| XmAb18087 (Tidutamab)    | 0  |   | 1 | CD3  | SSTR2        |  | NCT04590781 | Safety and Efficacy of XmAb18087 ± Pembrolizumab in Advanced Merkel Cell Carcinoma or Extensive-stage Small Cell Lung Cancer | Not yet recruiting | Merkel Cell Carcinoma   Small Cell Lung Cancer                                                                                                                                                                                                                                                                           | Xencor, Inc.   ICON plc                                            | Phase 1   Phase 2 | 142 | Xmab    |
| XmAb20717 (XmAb717)      | 0  | 0 | 3 | PD1  | CTLA4        |  | NCT03517488 | A Study of XmAb20717 in Subjects With Selected Advanced Solid Tumors                                                         | Re-cruiting        | Melanoma   Breast Carcinoma   Hepatocellular Carcinoma   Urothelial Carcinoma   Squamous Cell Carcinoma of the Head and Neck   Renal Cell Carcinoma   Colorectal Carcinoma   Non-small Cell Lung Carcinoma   Gastric or Gastroesophageal Junction Adenocarcinoma   Endometrial Carcinoma   Mesothelioma   Neuroendocrine | Xencor, Inc.   ICON plc                                            | Phase 1           | 154 | Xmab    |

[illegible]

| Advanced Solid Tumors |   |   |   |     |      |             |                                                                 |             |                                                 | Cancer   Hepato-cellular Carci-noma   Urothelial Carci-noma   Squa-mous Cell Carcinoma of the Head and Neck   Naso-pharyngeal Carci-noma   Renal Cell Carci-noma   Non-small Cell Lung Carci-noma   Small Cell Lung Carci-noma   Gas-tric or Gas-troesopha-geal Junction Adenocarci-noma   Ad-vanced or Metastatic Solid Tu-mors   Pros-tate Carci-noma   MSI-H   Mismatch Repair Defi-ciency   Epi-thelial Ovar-ian Can-cer   Fallo-pian Tube Cancer   Pri-mary Perito-neal Carci-noma   Intra-hepatic Cholangio-carci-noma   Squa-mous Cell Anal Can-cer   Squa-mous Cell Penile Carci-noma   Squa-mous Cell Vulvar Car-cinoma |         |     |      |  |  |  |  |  |  |
|-----------------------|---|---|---|-----|------|-------------|-----------------------------------------------------------------|-------------|-------------------------------------------------|----------------------------------------------------------------------------------------------------------------------------------------------------------------------------------------------------------------------------------------------------------------------------------------------------------------------------------------------------------------------------------------------------------------------------------------------------------------------------------------------------------------------------------------------------------------------------------------------------------------------------------|---------|-----|------|--|--|--|--|--|--|
| XmAb23104 (XmAb104)   | 0 | 1 | 3 | PD1 | ICOS | NCT03752398 | A Study of XmAb®23104 in Subjects With Selected Ad-vanced Solid | Re-cruiting | Melanoma (Excluding Uveal Melanoma)   Cer-vical | Xencor, Inc.   ICON plc                                                                                                                                                                                                                                                                                                                                                                                                                                                                                                                                                                                                          | Phase 1 | 234 | Xmab |  |  |  |  |  |  |

|        |   |   |   |      |      |             |                                                                                                                                           |                                                                                                                                                                                                                                                                                                                                                                                                                                                                                                         |                                                                                                                              |                     |         |     |    |
|--------|---|---|---|------|------|-------------|-------------------------------------------------------------------------------------------------------------------------------------------|---------------------------------------------------------------------------------------------------------------------------------------------------------------------------------------------------------------------------------------------------------------------------------------------------------------------------------------------------------------------------------------------------------------------------------------------------------------------------------------------------------|------------------------------------------------------------------------------------------------------------------------------|---------------------|---------|-----|----|
|        |   |   |   |      |      |             | Tumors (DUET-3)                                                                                                                           | Carcinoma   Pancreatic Carcinoma   Breast Carcinoma That is Estrogen Receptor, Progesterone Receptor, and Her2 Negative   Hepatocellular Carcinoma   Urothelial Carcinoma   Squamous Cell Carcinoma of the Head and Neck   Nasopharyngeal Carcinoma   Renal Cell Carcinoma   Colorectal Carcinoma   Endometrial Carcinoma   Non-small Cell Lung Carcinoma   Small Cell Lung Cancer   Gastric or Gastroesophageal Junction Adenocarcinoma   Advanced Solid Tumors   Undifferentiated Pleomorphic Sarcoma |                                                                                                                              |                     |         |     |    |
| BCA101 | 1 | 1 | 3 | EGFR | TGFb | NCT04429542 | Study of Safety and Tolerability of BCA101 Alone and in Combination With Pembrolizumab in Patients With EGFR-driven Advanced Solid Tumors | Recruiting                                                                                                                                                                                                                                                                                                                                                                                                                                                                                              | TNBC - Triple-Negative Breast Cancer   Head and Neck Squamous Cell Carcinoma   Squamous Cell Carcinoma of Anal Canal   Uveal | Bicara Therapeutics | Phase 1 | 292 | na |









|                      |   |   |   |     |       |             |                                                                                                                        |                        |                                                                                                                                                                              |                                                 |         |     |
|----------------------|---|---|---|-----|-------|-------------|------------------------------------------------------------------------------------------------------------------------|------------------------|------------------------------------------------------------------------------------------------------------------------------------------------------------------------------|-------------------------------------------------|---------|-----|
|                      |   | 2 |   |     |       | NCT03030287 | A Phase 1b Study of OMP-305B83 Plus Paclitaxel in Subjects With Ovarian, Peritoneal or Fallopian Tube Cancer           | Completed              | Cancer Ovaries   Cancer Peritoneal   Cancer Fallopian Tube                                                                                                                   | OncoMed Pharmaceuticals, Inc.   Mereo BioPharma | Phase 1 | 44  |
|                      |   | 0 |   |     |       | NCT02298387 | A Phase 1 Study of OMP-305B83 in Subjects With Solid Tumors                                                            | Completed              | Advanced Solid Tumor Malignancies                                                                                                                                            | OncoMed Pharmaceuticals, Inc.   Mereo BioPharma | Phase 1 | 71  |
|                      |   | 0 |   |     |       | NCT02248805 | Phase 1 Study of MGD007 in Relapsed/Refractory Metastatic Colorectal Carcinoma                                         | Completed              | Colorectal Carcinoma                                                                                                                                                         | MacroGenics                                     | Phase 1 | 95  |
| MGD007               | 1 |   | 1 | CD3 | gpA33 |             | MGD007 Combined With MGA012 in Relapsed/Refractory Metastatic Colorectal Cancer                                        | Active, not recruiting | Colorectal Cancer Metastatic                                                                                                                                                 | MacroGenics                                     | Phase 1 | 52  |
|                      |   | 0 |   |     |       | NCT03531632 |                                                                                                                        |                        |                                                                                                                                                                              |                                                 | Phase 1 | 2   |
|                      |   | 1 |   |     |       | NCT03406949 | MGD009/MGA012 Combination in Relapsed/Refractory Cancer                                                                | Active, not recruiting | Advanced Solid Tumors                                                                                                                                                        | MacroGenics                                     | Phase 1 | 25  |
| MGD009               | 1 |   | 1 | CD3 | B7H3  |             | Safety Study of MGD009 in B7-H3-expressing Tumors                                                                      | Terminated             | B7-H3-expressing tumors                                                                                                                                                      | MacroGenics                                     | Phase 1 | 67  |
|                      |   | 0 |   |     |       | NCT02628535 |                                                                                                                        |                        |                                                                                                                                                                              |                                                 |         |     |
|                      |   | 2 |   |     |       | NCT04082364 | Combination Margetuximab, INCMGA00012, MGD013, and Chemotherapy Phase 2/3 Trial in HER2+ Gastric/GEJ Cancer (MAHOGANY) | Recruiting             | Gastric Cancer   Gastroesophageal Junction Cancer   HER2-positive Gastric Cancer                                                                                             | MacroGenics   Zai Lab (Shanghai) Co., Ltd.      | Phase 2 | 860 |
|                      |   |   |   |     |       |             |                                                                                                                        |                        |                                                                                                                                                                              |                                                 |         |     |
| MGD013 (Tebotelimab) | 1 |   | 3 | PD1 | LAG3  |             |                                                                                                                        |                        | Advanced Solid Tumors   Hematologic Neoplasms   Ovarian Cancer   HER2-positive Breast Cancer   Non Small Cell Lung Cancer   Small-cell Lung Cancer   Squamous Cell Carcinoma |                                                 |         |     |
|                      |   | 2 |   |     |       | NCT03219268 | A Study of MGD013 in Patients With Unresectable or Metastatic Neoplasms                                                | Recruiting             |                                                                                                                                                                              | MacroGenics                                     | Phase 1 | 352 |

[illegible]

|                             |   |   |   |     |       |             |                                                                                                                                                                                                                                                 |                    |                                                 |               |         |     | Cancer-Prostate Cancer Metastatic Cutaneous Melanoma |
|-----------------------------|---|---|---|-----|-------|-------------|-------------------------------------------------------------------------------------------------------------------------------------------------------------------------------------------------------------------------------------------------|--------------------|-------------------------------------------------|---------------|---------|-----|------------------------------------------------------|
| AMG 110 (MT110) (Solitomab) | 0 | 0 | 1 | CD3 | EpCAM | NCT00635596 | Phase I Study of MT110 in Lung Cancer (Adenocarcinoma and Small Cell), Gastric Cancer or Adenocarcinoma of the Gastro-Esophageal Junction, Colorectal Cancer, Breast Cancer, Hormone-Refractory Prostate Cancer, and Ovarian Cancer (MT110-101) | Completed          | Solid Tumors                                    | Amgen         | Phase 1 | 65  | BITE                                                 |
|                             |   | 1 |   |     |       | NCT03792841 | Safety, Tolerability, Pharmacokinetics, and Efficacy of AMG 160 in Subjects With mCRPC                                                                                                                                                          | Recruiting         | Metastatic Castration-resistant Prostate Cancer | Amgen         | Phase 1 | 288 |                                                      |
| AMG 160                     | 1 | 3 | 1 | CD3 | PSMA  | NCT04631601 | Safety and Efficacy of Therapies for Metastatic Castration-resistant Prostate Cancer (mCRPC)                                                                                                                                                    | Recruiting         | Metastatic Castration-resistant Prostate Cancer | Amgen         | Phase 1 | 105 | HLE-BITE                                             |
|                             |   | 0 |   |     |       | NCT04822298 | Study of AMG 160 in Subjects With Non-Small Cell Lung Cancer                                                                                                                                                                                    | Not yet recruiting | Non-small Cell Lung Cancer/NSCLC                | Amgen         | Phase 1 | 50  |                                                      |
|                             |   | 0 |   |     |       | NCT01284231 | A Study to Evaluate the Safety and Tolerability of MEDI-565 in Adults With Gastrointestinal Adenocarcinomas                                                                                                                                     | Completed          | Gastrointestinal Adenocarcinomas                | MedImmune LLC | Phase 1 | 78  |                                                      |
| AMG 211 (MEDI-565)          | 0 |   | 1 | CD3 | CEA   | NCT02291614 | A Phase 1 Study of AMG 211 in Participants With Advanced Gastrointestinal Cancer                                                                                                                                                                | Terminated         | Gastrointestinal Adenocarcinomas                | MedImmune LLC | Phase 1 | 45  |                                                      |
|                             |   |   |   |     |       | NCT04221542 | A Phase 1 Study Evaluating the Safety, Tolerability,                                                                                                                                                                                            | Recruiting         | Prostate Cancer                                 | Amgen         | Phase 1 | 110 |                                                      |

|                      |   |   |   |      |              |             |  |                                                                                                                                                                                                                                                                                |                        |                                                      |        |         |     |          |
|----------------------|---|---|---|------|--------------|-------------|--|--------------------------------------------------------------------------------------------------------------------------------------------------------------------------------------------------------------------------------------------------------------------------------|------------------------|------------------------------------------------------|--------|---------|-----|----------|
|                      |   |   |   |      |              |             |  | Pharmacokinetics, and Efficacy of AMG 509 in Subjects With Metastatic Castration-Resistant Prostate Cancer                                                                                                                                                                     |                        |                                                      |        |         |     |          |
| AMG 596              | 0 | 1 | 1 | CD3  | EGFRvIII     | NCT03296696 |  | Phase 1/1b Study to Evaluate Safety, Tolerability, Pharmacokinetics and Pharmacodynamics of AMG 596 as Monotherapy and in Combination With AMG 404 in Subjects With Glioblastoma or Malignant Glioma Expressing Mutant Epidermal Growth Factor Receptor Variant III (EGFRvIII) | Active, not recruiting | Glioblastoma                                         | Amgen  | Phase 1 | 30  | BITE     |
|                      |   | 1 |   |      |              | NCT04885998 |  | AMG 757 and AMG 404 in Subjects With Small Cell Lung Cancer (SCLC)                                                                                                                                                                                                             | Not yet recruiting     | Small Cell Lung Carcinoma                            | Amgen  | Phase 1 | 40  |          |
| AMG 757              | 1 | 1 | 1 | CD3  | DLL3         | NCT03319940 |  | Study Evaluating Safety, Tolerability and PK of AMG 757 in Adults With Small Cell Lung Cancer                                                                                                                                                                                  | Recruiting             | Small Cell Lung Carcinoma                            | Amgen  | Phase 1 | 332 | HLE-BITE |
|                      |   | 0 |   |      |              | NCT04702737 |  | A Study of AMG 757 in Participants With Neuroendocrine Prostate Cancer                                                                                                                                                                                                         | Not yet recruiting     | Neuroendocrine Prostate Cancer                       | Amgen  | Phase 1 | 60  |          |
| AMG 910              | 1 | 0 | 1 | CD3  | Claudin 18.2 | NCT04260191 |  | Study of AMG 910 in Subjects With CLDN18.2-Positive Gastric and Gastroesophageal Junction Adenocarcinoma                                                                                                                                                                       | Recruiting             | Gastric and Gastroesophageal Junction Adenocarcinoma | Amgen  | Phase 1 | 70  | na       |
| Dilpacimab (ABT-165) | 1 | 2 | 1 | VEGF | DLL4         | NCT03368859 |  | A Study of ABT-165 Plus FOLFIRI vs Bevacizumab Plus FOLFIRI in Subjects With Metastatic                                                                                                                                                                                        | Terminated             | Metastatic Colorectal Cancer                         | AbbVie | Phase 2 | 70  | DVD-Ig   |

|                         |   |   |   |      |         |             |                                                                                                                  |                        |                                                                                                         |                                                                                                 |                   |     |    |  |
|-------------------------|---|---|---|------|---------|-------------|------------------------------------------------------------------------------------------------------------------|------------------------|---------------------------------------------------------------------------------------------------------|-------------------------------------------------------------------------------------------------|-------------------|-----|----|--|
|                         |   |   |   |      |         |             | Colorectal Cancer Previously Treated With Fluoropyrimidine, Oxaliplatin and Bevacizumab                          |                        |                                                                                                         |                                                                                                 |                   |     |    |  |
|                         |   | 2 |   |      |         | NCT01946074 | A Study of ABT-165 in Subjects With Solid Tumors                                                                 | Active, not recruiting | Advanced Solid Tumors                                                                                   | AbbVie                                                                                          | Phase 1           | 100 |    |  |
| IMC-C103C               | 0 | 1 | 1 | CD3  | MAGE-A4 | NCT03973333 | Safety and Efficacy of IMC-C103C as Monotherapy and in Combination With Atezolizumab                             | Re-cruiting            | Select Advanced Solid Tumors                                                                            | Immunocore Ltd                                                                                  | Phase 1   Phase 2 | 144 | na |  |
| IMC-F106C               | 0 | 1 | 1 | CD3  | PRAME   | NCT04262466 | Safety and Efficacy of IMC-F106C as a Single Agent and in Combination With Check-point Inhibitors                | Re-cruiting            | Select Advanced Solid Tumors                                                                            | Immunocore Ltd                                                                                  | Phase 1   Phase 2 | 170 | na |  |
|                         |   | 0 |   |      |         | NCT02517398 | MSB0011359C (M7824) in Metastatic or Locally Advanced Solid Tumors                                               | Active, not recruiting | Solid Tumors                                                                                            | EMD Serono Research & Development Institute, Inc.   Merck KGaA, Darmstadt, Germany   EMD Serono | Phase 1           | 600 |    |  |
|                         |   | 0 |   |      |         | NCT02699515 | MSB0011359C (M7824) in Subjects With Metastatic or Locally Advanced Solid Tumors                                 | Active, not recruiting | Solid Tumors                                                                                            | Merck KGaA, Darmstadt, Germany                                                                  | Phase 1           | 114 |    |  |
| M7824 (Bintrafusp alfa) | 1 | 3 | 3 | PDL1 | TGFb    | NCT02723955 | Dose Escalation and Expansion Study of GSK3359609 in Participants With Selected Advanced Solid Tumors (INDUCE-1) | Re-cruiting            | Neoplasms                                                                                               | GlaxoSmithKline   Merck Sharp & Dohme Corp.                                                     | Phase 1           | 873 | na |  |
|                         |   | 0 |   |      |         | NCT03427411 | M7824 in Subjects With HPV Associated Malignancies                                                               | Active, not recruiting | Human Papilloma Virus   Cervical Cancer   Oropharyngeal Cancer   Anal Cancer   Vaginal or Penile Cancer | National Cancer Institute (NCI)   National Institutes of Health Clinical Center (CC)            | Phase 2           | 57  |    |  |
|                         |   | 0 |   |      |         | NCT03436563 | M7824 in Patients With Metastatic Colorectal Cancer or With Advanced                                             | Re-cruiting            | Colon Adenocarcinoma   High-Frequency                                                                   | M.D. Anderson Cancer Center   National Cancer Institute (NCI)                                   | Phase 1   Phase 2 | 74  |    |  |

|   |             |                                                                                                                               |            |                                                                                                                                                                                                                                                                                                                  |                                                                                    |                 |    |
|---|-------------|-------------------------------------------------------------------------------------------------------------------------------|------------|------------------------------------------------------------------------------------------------------------------------------------------------------------------------------------------------------------------------------------------------------------------------------------------------------------------|------------------------------------------------------------------------------------|-----------------|----|
|   |             | Solid Tumors<br>With Microsatellite Instability                                                                               |            | Microsatellite Instability Meta-static Malignant Solid Neoplasm Rectal Adenocarcinoma Refractory Colorectal Carcinoma Stage IV Colon Cancer AJCC v8 Stage IV Rectal Cancer AJCC v8 Stage IVA Colon Cancer AJCC v8 Stage IVA Rectal Cancer AJCC v8 Stage IVB Colon Cancer AJCC v8 Stage IVB Rectal Cancer AJCC v8 |                                                                                    |                 |    |
| 2 | NCT03451773 | M7824 (MSB0011359C) in Combination With Gemcitabine in Adults With Previously Treated Advanced Adenocarcinoma of the Pancreas | Completed  | Cancer of Pancreas Pancreatic Adenocarcinoma Pancreatic Cancer Pancreatic Neoplasms                                                                                                                                                                                                                              | National Cancer Institute (NCI) National Institutes of Health Clinical Center (CC) | Phase 1 Phase 2 | 7  |
| 2 | NCT03524170 | Radiation Therapy and M7824 in Treating Patients With Metastatic Hormone Receptor Positive, HER2 Negative Breast Cancer       | Recruiting | Anatomic Stage IV Breast Cancer AJCC v8 Metastatic Breast Carcinoma Prognostic Stage IV Breast Cancer AJCC v8                                                                                                                                                                                                    | M.D. Anderson Cancer Center National Cancer Institute (NCI)                        | Phase 1         | 20 |
| 2 | NCT03554473 | M7824 and Topotecan or Temozolomide in Relapsed Small Cell Lung Cancers                                                       | Recruiting | Carcinoma, Small Cell Lung Cancer Small Cell Lung Cancer                                                                                                                                                                                                                                                         | National Cancer Institute (NCI) National Institutes of Health Clinical Center (CC) | Phase 1 Phase 2 | 67 |
| 2 | NCT03579472 | M7824 and Eribulin Mesylate in Treating                                                                                       | Recruiting | Anatomic Stage IV Breast                                                                                                                                                                                                                                                                                         | M.D. Anderson Cancer Center National                                               | Phase 1         | 20 |

|   |             |                                                                                        |                      |                                                                                                                                                                                                                                                                                                                                                                                                                                                                                                                                                                                                                                                                                                                                                                 |                                                                                      |
|---|-------------|----------------------------------------------------------------------------------------|----------------------|-----------------------------------------------------------------------------------------------------------------------------------------------------------------------------------------------------------------------------------------------------------------------------------------------------------------------------------------------------------------------------------------------------------------------------------------------------------------------------------------------------------------------------------------------------------------------------------------------------------------------------------------------------------------------------------------------------------------------------------------------------------------|--------------------------------------------------------------------------------------|
|   |             | Patients With<br>Metastatic Tri-<br>ple Negative<br>Breast Cancer                      |                      | Cancer AJCC Cancer Institute<br>v8 Meta-<br>static Triple-<br>Negative<br>Breast Carci-<br>noma Prog-<br>nostic Stage<br>IV Breast<br>Cancer AJCC<br>v8                                                                                                                                                                                                                                                                                                                                                                                                                                                                                                                                                                                                         |                                                                                      |
|   |             |                                                                                        |                      | Anatomic<br>Stage II<br>Breast Can-<br>cer AJCC<br>v8 Ana-<br>tomic Stage<br>IIA Breast<br>Cancer AJCC<br>v8 Ana-<br>tomic Stage<br>IIB Breast<br>Cancer AJCC<br>v8 Ana-<br>tomic Stage<br>III Breast<br>Cancer AJCC<br>v8 Ana-<br>tomic Stage<br>IIIA Breast<br>Cancer AJCC<br>v8 Ana-<br>tomic Stage<br>IIIB Breast<br>Cancer AJCC<br>v8 Ana-<br>tomic Stage<br>IIIC Breast<br>Cancer AJCC<br>v8 Prognos-<br>tic Stage II<br>Breast Can-<br>cer AJCC<br>v8 Prognos-<br>tic Stage IIA<br>Breast Can-<br>cer AJCC<br>v8 Prognos-<br>tic Stage IIB<br>Breast Can-<br>cer AJCC<br>v8 Prognos-<br>tic Stage III<br>Breast Can-<br>cer AJCC<br>v8 Prognos-<br>tic Stage IIIA<br>Breast Can-<br>cer AJCC<br>v8 Prognos-<br>tic Stage IIIB<br>Breast Can-<br>cer AJCC |                                                                                      |
| 0 | NCT03620201 | M7824 in Treat-<br>ing Patients<br>With Stage II-III<br>HER2 Positive<br>Breast Cancer | Re-<br>cruit-<br>ing |                                                                                                                                                                                                                                                                                                                                                                                                                                                                                                                                                                                                                                                                                                                                                                 | M.D. Anderson<br>Cancer Cen-<br>ter National Phase 1 20<br>Cancer Institute<br>(NCI) |

|   |             |                                                                                                                                                                                         |                        |                                                                                                             |                                                                                             |                 |     |
|---|-------------|-----------------------------------------------------------------------------------------------------------------------------------------------------------------------------------------|------------------------|-------------------------------------------------------------------------------------------------------------|---------------------------------------------------------------------------------------------|-----------------|-----|
|   |             |                                                                                                                                                                                         |                        | v8 Prognostic Stage IIIC Breast Cancer AJCC v8                                                              |                                                                                             |                 |     |
| 0 | NCT03833661 | M7824 Monotherapy in Locally Advanced or Metastatic Second Line (2L) Biliary Tract Cancer (Cholangiocarcinoma and Gallbladder Cancer)                                                   | Active, not recruiting | Biliary Tract Cancer Cholangiocarcinoma Gallbladder Cancer                                                  | EMD Serono Research & Development Institute, Inc. Merck KGaA, Darmstadt, Germany EMD Serono | Phase 2         | 159 |
| 2 | NCT03840915 | M7824 in Combination With Chemotherapy in Stage IV Non-small Cell Lung Cancer (NSCLC)                                                                                                   | Active, not recruiting | Carcinoma, Non-Small-Cell Lung                                                                              | EMD Serono Research & Development Institute, Inc. Merck KGaA, Darmstadt, Germany EMD Serono | Phase 1 Phase 2 | 70  |
| 2 | NCT04066491 | Gemcitabine Plus Cisplatin With or Without Bintrafusp Alfa (M7824) in Participants With 1L Biliary Tract Cancer (BTC)                                                                   | Re-recruiting          | Biliary Tract Cancer Cholangiocarcinoma Gallbladder Cancer                                                  | EMD Serono Research & Development Institute, Inc. Merck KGaA, Darmstadt, Germany EMD Serono | Phase 2 Phase 3 | 512 |
| 2 | NCT04220775 | Bintrafusp Alfa and Stereotactic Body Radiation Therapy for the Treatment of Recurrent or Second Primary Head and Neck Squamous Cell Cancer                                             | Re-recruiting          | Recurrent Head and Neck Squamous Cell Carcinoma Second Primary Squamous Cell Carcinoma of the Head and Neck | M.D. Anderson Cancer Center National Cancer Institute (NCI)                                 | Phase 1 Phase 2 | 21  |
| 2 | NCT04235777 | Bintrafusp Alfa (M7824) and NHS-IL12 (M9241) Alone and in Combination With Stereotactic Body Radiation Therapy (SBRT) in Adults With Metastatic Non-Prostate Genitourinary Malignancies | Re-recruiting          | Urothelial Cancer Bladder Cancer Genitourinary Cancer Urogenital Neoplasms Urogenital Cancer                | National Cancer Institute (NCI) National Institutes of Health Clinical Center (CC)          | Phase 1         | 66  |
| 1 | NCT04247282 | Anti-PD-L1/TGF-beta Trap (M7824) Alone and in                                                                                                                                           | Re-recruiting          | Head and Neck Cancer Head                                                                                   | National Cancer Institute (NCI) National Institutes of                                      | Phase 1 Phase 2 | 40  |



|   |             |                                                                                                                                                  |             |                                                                                                                                  |                                                                                    |                 |    |
|---|-------------|--------------------------------------------------------------------------------------------------------------------------------------------------|-------------|----------------------------------------------------------------------------------------------------------------------------------|------------------------------------------------------------------------------------|-----------------|----|
|   |             | Combination With TriAd Vaccine and N-803 for Resectable Head and Neck Squamous Cell Carcinoma Not Associated With Human Papillomavirus Infection |             | and Neck Neoplasms                                                                                                               | Health Clinical Center (CC)                                                        |                 |    |
| 1 | NCT04287868 | Combination Immunotherapy in Subjects With Advanced HPV Associated Malignancies                                                                  | Re-cruiting | Cervical Cancer HPV Cancers Anal Cancer Oropharyngeal Cancer Vulvar, Vaginal, Penile, Rectal Cancer                              | National Cancer Institute (NCI) National Institutes of Health Clinical Center (CC) | Phase 1 Phase 2 | 56 |
| 3 | NCT04296942 | BN-Brachyury, Entinostat, Ado-trastuzumab Emtrastine and M7824 in Advanced Stage Breast Cancer (BrEAsT)                                          | Re-cruiting | Breast Cancer Triple Negative Breast Cancer HER2+ Breast Cancer Hormone Receptor Negative Breast Cancer Metastatic Breast Cancer | National Cancer Institute (NCI) National Institutes of Health Clinical Center (CC) | Phase 1         | 65 |
| 1 | NCT04303117 | NHS-IL12 Monotherapy and in Combination With M7824 in Advanced Kaposi Sarcoma                                                                    | Re-cruiting | Kaposi Sarcoma                                                                                                                   | National Cancer Institute (NCI) National Institutes of Health Clinical Center (CC) | Phase 1 Phase 2 | 56 |
| 0 | NCT04349280 | A Study to Evaluate the Efficacy and Safety of Bintrafusp Alfa (M7824) Monotherapy in Metastatic or Locally Advanced Urothelial Cancer           | Re-cruiting | Neoplasms                                                                                                                        | GlaxoSmithKline M erck KGaA, Darmstadt, Germany                                    | Phase 1         | 40 |
| 2 | NCT04396535 | Docetaxel With or Without Bintrafusp Alfa for the Treatment of Advanced Non-small Cell Lung Cancer                                               | Re-cruiting | Advanced Lung Non-Small Cell Carcinoma Stage III Lung Cancer AJCC v8 Stage IIIA Lung Cancer AJCC v8 Stage IIIB Lung Cancer       | Mayo Clinic National Cancer Institute (NCI)                                        | Phase 2         | 80 |

|   |             |                                                                                                                                    |             |                                                                                                                                                                     |                                                                                                                                                                                                                                                                |                    |
|---|-------------|------------------------------------------------------------------------------------------------------------------------------------|-------------|---------------------------------------------------------------------------------------------------------------------------------------------------------------------|----------------------------------------------------------------------------------------------------------------------------------------------------------------------------------------------------------------------------------------------------------------|--------------------|
|   |             |                                                                                                                                    |             | AJCC<br>v8 Stage<br>IIIC Lung<br>Cancer AJCC<br>v8 Stage IV<br>Lung Cancer<br>AJCC<br>v8 Stage<br>IVA Lung<br>Cancer AJCC<br>v8 Stage IVB<br>Lung Cancer<br>AJCC v8 |                                                                                                                                                                                                                                                                |                    |
| 0 | NCT04396886 | Bintrafusp Alfa in Previously Treated Patients With Recurrent and Metastatic (R/M) Non-keratinizing Nasopharyngeal Carcinoma (NPC) | Re-cruiting | Nasopharyngeal Carcinoma Recurrent Carcinoma Metastatic Cancer Non-keratinizing Carcinoma                                                                           | The University of Hong Kong Merck Healthcare KGaA, Darmstadt, Germany, an affiliate of Merck KGaA, Darmstadt, Germany                                                                                                                                          | Phase 2 37         |
| 0 | NCT04428047 | Evaluation of Bintrafusp Alfa in Operable and Untreated Head and Neck Squamous Cell Carcinoma                                      | Re-cruiting | Squamous Cell Carcinoma of Head and Neck                                                                                                                            | UNI-CANCER Merck KGaA, Darmstadt, Germany                                                                                                                                                                                                                      | Phase 2 59         |
| 1 | NCT04432597 | HPV Vaccine PRGN-2009 Alone or in Combination With Anti-PDL1/TGF-Beta Trap (M7824) in Subjects With HPV Associated Cancers         | Re-cruiting | HPV Positive Cancer Vulvar, Vaginal, Penile, Rectal Cancer Anal Cancer Oropharyngeal Cancer Cervical Cancer                                                         | National Cancer Institute (NCI) National Institutes of Health Clinical Center (CC)                                                                                                                                                                             | Phase 1 Phase 2 76 |
| 2 | NCT04481256 | TGF-b And PDL-1 Inhibition in Esophageal Squamous Cell Carcinoma Combined With Chemoradiation Therapy                              | Re-cruiting | Carcinoma, Squamous Cell Esophageal Cancer                                                                                                                          | Academisch Medisch Centrum - Universiteit van Amsterdam (AMC-UvA) UMC Utrecht Catharina Ziekenhuis Eindhoven Verbeeten Instituut Tilburg Elisabeth-TweeSteden Ziekenhuis Leiden University Medical Center Radiotherapeutic Institute Friesland Medisch Centrum | Not Applicable 49  |

|   |             |                                                                                                                             |             |                                          |                                                                                                 |                   |                                                                                                                                                                                                              |
|---|-------------|-----------------------------------------------------------------------------------------------------------------------------|-------------|------------------------------------------|-------------------------------------------------------------------------------------------------|-------------------|--------------------------------------------------------------------------------------------------------------------------------------------------------------------------------------------------------------|
|   |             |                                                                                                                             |             |                                          |                                                                                                 |                   | Leeuwarden   Radiotherapy Group<br>Deventer   Deventer<br>Ziekenhuis   Rijnstate Hospital   Erasmus Medical Center   The Netherlands Cancer Institute   Maastricht University Medical Center Groningen   ZGT |
| 0 | NCT04489940 | Bintrafusp Alfa in High Mobility Group AT-Hook 2 (HMGA2) Expressing Triple Negative Breast Cancer                           | Re-cruiting | Triple Negative Breast Neoplasms         | EMD Serono Research & Development Institute, Inc.   Merck KGaA, Darmstadt, Germany   EMD Serono | Phase 2           | 29                                                                                                                                                                                                           |
| 1 | NCT04491955 | Phase II Trial of Combination Immunotherapy in Subjects With Advanced Small Bowel and Colorectal Cancers                    | Re-cruiting | Small Bowel Cancers   Colorectal Cancers | National Cancer Institute (NCI)   National Institutes of Health Clinical Center (CC)            | Phase 2           | 80                                                                                                                                                                                                           |
| 0 | NCT04501094 | A Phase II Study of Bintrafusp Alfa (M7824) in Checkpoint Inhibitor Naive and Refractory Subjects With Urothelial Carcinoma | Re-cruiting | Urothelial Cancer                        | National Cancer Institute (NCI)   National Institutes of Health Clinical Center (CC)            | Phase 2           | 75                                                                                                                                                                                                           |
| 2 | NCT04551950 | Bintrafusp Alfa Combination Therapy in Participants With Cervical Cancer (INTR@PID 046)                                     | Re-cruiting | Cervical Cancer                          | EMD Serono Research & Development Institute, Inc.   Merck KGaA, Darmstadt, Germany   EMD Serono | Phase 1           | 25                                                                                                                                                                                                           |
| 1 | NCT04574583 | Phase I/II Trial Investigating the Safety, Tolerability, Pharmacokinetics, Immune and                                       | Re-cruiting | Metastatic Cancer   Solid Tumors         | National Cancer Institute (NCI)   National Institutes of Health Clinical Center (CC)            | Phase 1   Phase 2 | 105                                                                                                                                                                                                          |

|   |             |                                                                                                                                                                                                                      |                    |                                                                                                                                                                                                                                             |                                                                                    |                 |    |
|---|-------------|----------------------------------------------------------------------------------------------------------------------------------------------------------------------------------------------------------------------|--------------------|---------------------------------------------------------------------------------------------------------------------------------------------------------------------------------------------------------------------------------------------|------------------------------------------------------------------------------------|-----------------|----|
|   |             | Clinical Activity of SX-682 in Combination With Bintrafusp Alfa (M7824 or TGF-beta "Trap"/PD-L1) With CV301 TRICOM in Advanced Solid Tumors (STAT)                                                                   |                    |                                                                                                                                                                                                                                             |                                                                                    |                 |    |
| 2 | NCT04633252 | Bintrafusp Alfa (M7824) and M9241 in Combination With Docetaxel in Adults With Metastatic Castration Sensitive and Castration Resistant Prostate Cancer                                                              | Re-cruiting        | Cancer Of Prostate Neoplasms                                                                                                                                                                                                                | National Cancer Institute (NCI) National Institutes of Health Clinical Center (CC) | Phase 1 Phase 2 | 86 |
| 2 | NCT04648826 | Aerosolized Azacytidine as Epigenetic Priming for Bintrafusp Alfa-Mediated Immune Checkpoint Blockade in Patients With Unresectable Pulmonary Metastases From Sarcomas, Germ Cell Tumors, or Epithelial Malignancies | Not yet recruiting | Sarcomas Melanomas Germ Cell Tumors Epithelial Malignancies (Excluding Lung and Renal Cell Carcinomas) Pulmonary Metastases                                                                                                                 | National Cancer Institute (NCI) National Institutes of Health Clinical Center (CC) | Phase 1 Phase 2 | 42 |
| 2 | NCT04708067 | Hypofractionated Radiation Therapy and Bintrafusp Alfa for the Treatment of Advanced Intrahepatic Cholangiocarcinoma                                                                                                 | Not yet recruiting | Locally Advanced Intrahepatic Cholangiocarcinoma Metastatic Intrahepatic Cholangiocarcinoma Stage III Intrahepatic Cholangiocarcinoma AJCC v8 Stage IIIA Intrahepatic Cholangiocarcinoma AJCC v8 Stage IIIB Intrahepatic Cholangiocarcinoma | M.D. Anderson Cancer Center                                                        | Phase 1         | 15 |

|   |             |                                                                                                                                                                          |                                                                           |                                                                                                                                                                                                              |                                                                                    |                    |
|---|-------------|--------------------------------------------------------------------------------------------------------------------------------------------------------------------------|---------------------------------------------------------------------------|--------------------------------------------------------------------------------------------------------------------------------------------------------------------------------------------------------------|------------------------------------------------------------------------------------|--------------------|
|   |             |                                                                                                                                                                          | AJCC<br>v8 Stage IV<br>Intrahepatic<br>Cholangio-<br>carcinoma<br>AJCC v8 |                                                                                                                                                                                                              |                                                                                    |                    |
| 1 | NCT04708470 | Phase I/II Trial of the Combination of Bintrafusp Alfa (M7824), Entinostat and NHS-IL12 (M9241) in Patients With Advanced Cancer                                         | Not yet recruiting                                                        | Cancer Solid Tumor Metastatic<br>Checkpoint Refractory HPV Associated Malignancies Microsatellite Stable Colon Cancer (MSS)                                                                                  | National Cancer Institute (NCI) National Institutes of Health Clinical Center (CC) | Phase 1 Phase 2 60 |
| 0 | NCT04727541 | Neoadjuvant Bintrafusp Alfa in Patients With Resectable Biliary Tract Cancer                                                                                             | Not yet recruiting                                                        | Biliary Tract Cancer Cholangiocarcinoma                                                                                                                                                                      | AIO-Studien-GmbH Merck Serono GmbH, Germany                                        | Phase 2 24         |
| 3 | NCT04756505 | Immunotherapy (NHS-IL12 & Bintrafusp Alfa) and Radiation Therapy for the Treatment of Hormone Receptor Positive, HER2 Negative Metastatic Breast Cancer, the REINA Trial | Not yet recruiting                                                        | Anatomic Stage IV Breast Cancer AJCC v8 Hormone Receptor Positive Breast Adenocarcinoma Metastatic Breast Carcinoma Metastatic HER2 Negative Breast Adenocarcinoma Prognostic Stage IV Breast Cancer AJCC v8 | M.D. Anderson Cancer Center                                                        | Phase 1 20         |
| 2 | NCT04789668 | Bintrafusp Alfa and Pimasertib for the Treatment of Patients With Brain Metastases                                                                                       | Recruiting                                                                | Anatomic Stage IV Breast Cancer AJCC v8 Clinical Stage IV Cutaneous Melanoma AJCC v8 Hematopoietic and Lymphoid Cell Neoplasm Hormone Receptor Positive Breast                                               | M.D. Anderson Cancer Center                                                        | Phase 1 Phase 2 36 |

|   |             |                                                                                                                           |                        |                                                                                                                            |                                                                                                                                                                                                                                                                                                                                                                                                              |                 |    |  |  |
|---|-------------|---------------------------------------------------------------------------------------------------------------------------|------------------------|----------------------------------------------------------------------------------------------------------------------------|--------------------------------------------------------------------------------------------------------------------------------------------------------------------------------------------------------------------------------------------------------------------------------------------------------------------------------------------------------------------------------------------------------------|-----------------|----|--|--|
|   |             |                                                                                                                           |                        |                                                                                                                            | Adenocarcinoma   Metastatic Lung Non-Small Cell Carcinoma   Metastatic Malignant Neoplasm in the Brain   Metastatic Malignant Solid Neoplasm   Metastatic Melanoma   Metastatic Triple-Negative Breast Carcinoma   Pathologic Stage IV Cutaneous Melanoma AJCC v8   Prognostic Stage IV Breast Cancer AJCC v8   Stage IV Lung Cancer AJCC v8   Stage IVA Lung Cancer AJCC v8   Stage IVB Lung Cancer AJCC v8 |                 |    |  |  |
| 2 | NCT04835896 | Study of M7824 and Paclitaxel Combination as a Second-line Treatment in Patients With Recurrent/Metastatic Gastric Cancer | Not yet recruiting     | Recurrent/Metastatic Gastric Cancer                                                                                        | Yonsei University                                                                                                                                                                                                                                                                                                                                                                                            | Phase 1/Phase 2 | 49 |  |  |
| 0 | NCT03707587 | M7824 in People With Recurrent Respiratory Papillomatosis                                                                 | Active, not recruiting | Recurrent Respiratory Papillomatosis   Respiratory Papillomatosis   Laryngeal Papilloma, Recurrent   Human Papilloma Virus | National Cancer Institute (NCI)   National Institutes of Health Clinical Center (CC)                                                                                                                                                                                                                                                                                                                         | Phase 2         | 9  |  |  |
| 0 | NCT04417660 | Bintrafusp Alfa (M7824) in Subjects With Thyoma and Thymic Carcinoma                                                      | Recruiting             | Thymic Epithelial Tumor   Recurrent Thyoma   Thymic Cancer                                                                 | National Cancer Institute (NCI)   National Institutes of Health Clinical Center (CC)                                                                                                                                                                                                                                                                                                                         | Phase 2         | 38 |  |  |

|   |             |                                                                                                                                                                         |                        |                                                                                                                                                                                                 |                                                                                                 |                   |     |
|---|-------------|-------------------------------------------------------------------------------------------------------------------------------------------------------------------------|------------------------|-------------------------------------------------------------------------------------------------------------------------------------------------------------------------------------------------|-------------------------------------------------------------------------------------------------|-------------------|-----|
| 3 | NCT04327986 | Immune Checkpoint Inhibitor M7824 and the Immunocytokine M9241 in Combination With Stereotactic Body Radiation Therapy (SBRT) in Adults With Advanced Pancreas Cancer   | Re-cruiting            | Histologically or Cytologically Confirmed Pancreatic Cancer   Unresectable or Borderline Resectable Pancreatic Cancer   Pancreatic Neoplasms   Pancreatic Cancer   Metastatic Pancreatic Cancer | National Cancer Institute (NCI)   National Institutes of Health Clinical Center (CC)            | Phase 1   Phase 2 | 52  |
| 0 | NCT03631706 | M7824 Versus Pembrolizumab as a First-line (1L) Treatment in Participants With Programmed Death-ligand 1 (PD-L1) Expressing Advanced Non-small Cell Lung Cancer (NSCLC) | Active, not recruiting | Non-small Cell Lung Cancer                                                                                                                                                                      | EMD Serono Research & Development Institute, Inc.   Merck KGaA, Darmstadt, Germany   EMD Serono | Phase 3           | 584 |
| 3 | NCT03840902 | M7824 With cCRT in Unresectable Stage III Non-small Cell Lung Cancer (NSCLC)                                                                                            | Re-cruiting            | Non-small Cell Lung Cancer                                                                                                                                                                      | EMD Serono Research & Development Institute, Inc.   Merck KGaA, Darmstadt, Germany   EMD Serono | Phase 2           | 350 |
| 3 | NCT03493945 | Phase I/II Study of Immunotherapy Combination BN-Brachyury Vaccine, M7824, N-803 and Epacadostat (QuEST1)                                                               | Re-cruiting            | Metastatic Prostate Cancer   Prostate Cancer   Prostate Neoplasm   Advanced Solid Tumors   Solid Tumor                                                                                          | National Cancer Institute (NCI)   National Institutes of Health Clinical Center (CC)            | Phase 1   Phase 2 | 113 |
| 0 | NCT04246489 | Bintrafusp Alfa Monotherapy in Platinum-Experienced Cervical Cancer                                                                                                     | Active, not recruiting | Uterine Cervical Neoplasms                                                                                                                                                                      | EMD Serono Research & Development Institute, Inc.   Merck KGaA, Darmstadt, Germany   EMD Serono | Phase 2           | 146 |

|                            |  |  |  |  |  |   |             |                                                                                                                    |             |                                                                                                                                                                                                                                                                                                                                                                        |                                                                                      |                                                                                   |             |                          |                      |                   |     |      |
|----------------------------|--|--|--|--|--|---|-------------|--------------------------------------------------------------------------------------------------------------------|-------------|------------------------------------------------------------------------------------------------------------------------------------------------------------------------------------------------------------------------------------------------------------------------------------------------------------------------------------------------------------------------|--------------------------------------------------------------------------------------|-----------------------------------------------------------------------------------|-------------|--------------------------|----------------------|-------------------|-----|------|
|                            |  |  |  |  |  | 0 | NCT04595149 | Tapestry: Addition of TGFb and PDL-1 Inhibition to Definitive Chemoradiation in Esophageal Squamous Cell Carcinoma | Re-cruiting | Neoplasm, Esophagus   Malignant Esophagus Tumor   Neoplasm, Esophageal                                                                                                                                                                                                                                                                                                 | Academisch Medisch Centrum - Universiteit van Amsterdam (AMC-UvA)                    | Phase 2                                                                           | 52          |                          |                      |                   |     |      |
|                            |  |  |  |  |  | 0 | NCT04560686 | Bintrafusp Alfa Before Surgery for the Treatment of Untreated Resectable Non-small Cell Lung Cancer                | Re-cruiting | Resectable Lung Non-Small Cell Carcinoma   Stage I Lung Cancer AJCC v8   Stage IA1 Lung Cancer AJCC v8   Stage IA2 Lung Cancer AJCC v8   Stage IA3 Lung Cancer AJCC v8   Stage IB Lung Cancer AJCC v8   Stage II Lung Cancer AJCC v8   Stage IIA Lung Cancer AJCC v8   Stage IIB Lung Cancer AJCC v8   Stage IIIA Lung Cancer AJCC v8   Stage IIIB Lung Cancer AJCC v8 | M.D. Anderson Cancer Center   National Cancer Institute (NCI)                        | Phase 2                                                                           | 23          |                          |                      |                   |     |      |
|                            |  |  |  |  |  | 1 | NCT03315871 | Combination Immunotherapy in Biochemically Recurrent Prostate Cancer                                               | Re-cruiting | Prostate Cancer                                                                                                                                                                                                                                                                                                                                                        | National Cancer Institute (NCI)   National Institutes of Health Clinical Center (CC) | Phase 2                                                                           | 34          |                          |                      |                   |     |      |
| BAY2010112 (Pasotuxizumab) |  |  |  |  |  | 0 | 0           | 1                                                                                                                  | CD3         | PSMA                                                                                                                                                                                                                                                                                                                                                                   | NCT01723475                                                                          | First-in-man Dose Escalation Study of BAY2010112 in Patients With Prostate Cancer | Completed   | Prostatic Neoplasms      | Bayer                | Phase 1           | 47  | BITE |
| HPN-424                    |  |  |  |  |  | 0 | 0           | 1                                                                                                                  | CD3         | PSMA                                                                                                                                                                                                                                                                                                                                                                   | NCT03577028                                                                          | Study of HPN424 in Patients With Advanced Prostate Cancer                         | Re-cruiting | Advanced Prostate Cancer | Harpoon Therapeutics | Phase 1   Phase 2 | 40  | DART |
| BTRC4017A (RG6194)         |  |  |  |  |  | 1 | 0           | 1                                                                                                                  | CD3         | HER2                                                                                                                                                                                                                                                                                                                                                                   | NCT03448042                                                                          | A Phase I Study of BTRC4017A in Participants                                      | Re-cruiting | Solid Tumors             | Genentech, Inc.      | Phase 1           | 449 | na   |



|                            |   |      |   |      |       |                                                             |                                                                                                                                                 |                        |                                                      |                              |         |     |             |
|----------------------------|---|------|---|------|-------|-------------------------------------------------------------|-------------------------------------------------------------------------------------------------------------------------------------------------|------------------------|------------------------------------------------------|------------------------------|---------|-----|-------------|
|                            |   |      |   |      |       | With Locally Advanced or Metastatic HER2-Expressing Cancers |                                                                                                                                                 |                        |                                                      |                              |         |     |             |
| MEDI5752                   | 1 | 1, 2 | 3 | PD1  | CTLA4 | NCT03819465                                                 | A Study of Novel Anti-cancer Agents in Patients With Previously Untreated NSCLC (MAGELLAN)                                                      | Active, not recruiting | Metastatic Non-Small Cell Lung Cancer (NSCLC)        | MedImmune LLC                | Phase 1 | 212 | DuetMab/KIH |
|                            |   | 1, 2 |   |      |       | NCT03530397                                                 | Evaluate MEDI5752 in Subjects With Advanced Solid Tumors                                                                                        | Re-cruiting            | Selected Advanced Solid Tumors                       | MedImmune LLC                | Phase 1 | 261 |             |
|                            |   | 2    |   |      |       | NCT04522323                                                 | A Study to Evaluate MEDI5752 and Axitinib in Subjects With Advanced Renal Cell Carcinoma                                                        | Active, not recruiting | Advanced Renal Cell Carcinoma                        | MedImmune LLC                | Phase 1 | 77  |             |
| PRS-343 (Cinrebafusp Alfa) | 0 | 1    | 1 | HER2 | 41BB  | NCT03650348                                                 | PRS-343 in Combination With Atezolizumab in HER2-Positive Solid Tumors                                                                          | Active, not recruiting | HER2-positive Solid Tumor (Breast, Gastric, Bladder) | Pieris Pharmaceuticals, Inc. | Phase 1 | 45  | Anticalins  |
|                            |   | 0    |   |      |       | NCT03330561                                                 | PRS-343 in HER2-Positive Solid Tumors                                                                                                           | Re-cruiting            | HER2-positive Solid Tumor (Breast, Gastric, Bladder) | Pieris Pharmaceuticals, Inc. | Phase 1 | 110 |             |
| BI 836880                  | 0 | 1    | 3 | VEGF | Ang2  | NCT03972150                                                 | A Study to Find the Best Dose of BI 836880 Alone and in Combination With BI 754091 in Japanese Patients With Different Types of Advanced Cancer | Active, not recruiting | Neoplasms                                            | Boehringer Ingelheim         | Phase 1 | 21  | Nanobody    |
|                            |   | 0    |   |      |       | NCT02689505                                                 | Weekly BI 836880 in Patients With Advanced Solid Tumors                                                                                         | Completed              | Neoplasms                                            | Boehringer Ingelheim         | Phase 1 | 24  |             |
|                            |   | 0    |   |      |       | NCT02674152                                                 | Dose Finding Study of BI 836880 in Patients With Solid Tumors                                                                                   | Completed              | Neoplasms                                            | Boehringer Ingelheim         | Phase 1 | 29  |             |
|                            |   | 1    |   |      |       | NCT04499352                                                 | A Study to Test BI 754091 Alone or in Combination With BI 836880 in People Who Have                                                             | Withdrawn              | Anal Canal Squamous Cell Carcinoma                   | Boehringer Ingelheim         | Phase 2 | 0   |             |

|           |   |   |   |        |        |                                                                                                                                                                                                         |                                                                                                                                    |                         |                                                      |                        |         |     |          |
|-----------|---|---|---|--------|--------|---------------------------------------------------------------------------------------------------------------------------------------------------------------------------------------------------------|------------------------------------------------------------------------------------------------------------------------------------|-------------------------|------------------------------------------------------|------------------------|---------|-----|----------|
|           |   |   |   |        |        | Advanced Anal Cancer                                                                                                                                                                                    |                                                                                                                                    |                         |                                                      |                        |         |     |          |
|           |   |   |   |        |        | A Study to Test Different Doses of BI 836880 Combined With BI 754091 in Patients With Advanced Non-small Cell Lung Cancer Followed by Other Types of Advanced Solid Tumours                             |                                                                                                                                    | Re-cruiting             | Non-squa-mous, Non-Small-Cell Lung Cancer Neo-plasms | Boehringer Ingelheim   | Phase 1 | 245 |          |
| 1         |   |   |   |        |        | NCT03468426                                                                                                                                                                                             |                                                                                                                                    |                         |                                                      |                        |         |     |          |
|           |   |   |   |        |        | Platform Trial Evaluating Safety and Efficacy of BI 754091 Anti-PD-1 Based Combination Therapies in PD-(L)1 naive and PD- (L)1 Pretreated Patient Populations With Advanced/Meta-static Solid Tu-mours. |                                                                                                                                    | Re-cruiting             | Neoplasm Metastasis                                  | Boehringer Ingelheim   | Phase 2 | 260 |          |
| 1         |   |   |   |        |        | NCT03697304                                                                                                                                                                                             |                                                                                                                                    |                         |                                                      |                        |         |     |          |
|           |   |   |   |        |        |                                                                                                                                                                                                         |                                                                                                                                    |                         |                                                      |                        |         |     |          |
| BI 905677 | 0 | 0 | 2 | LRP5/6 | LRP5/6 | NCT03604445                                                                                                                                                                                             | This Study Aims to Find and Test a Safe Dose of BI 905677 in Patients With Different Types of Cancer (Solid Tumours)               | Re-cruiting             | Solid Tu-mors                                        | Boehringer Ingelheim   | Phase 1 | 78  | Nanobody |
|           |   |   |   |        |        |                                                                                                                                                                                                         |                                                                                                                                    |                         |                                                      |                        |         |     |          |
| MP0274    | 0 | 0 | 2 | HER2   | HER2   | NCT03084926                                                                                                                                                                                             | First-in-human Study to Investigate Safety, Blood Levels and Activity of MP0274 in Cancer Patients With HER2-positive Solid Tumors | Active, not re-cruiting | HER2-posi-tive Solid Tumors                          | Molecular Part-ners AG | Phase 1 | 46  | DARPin   |

**Table S1. Clinical Trials investigating bsAbs in Solid Malignancies.** Table showing all the bsAbs in clinical trials as of June 30th 2021, after interrogation of the ClinicalTrials.gov database using the terms “bispecific”, “antibody”, “solid tumors”, “solid malignancies”, “cancer” and variations of these terms, followed by manual verification for as drug product.

| TRIAL/NCT                  | Agent            | Full name                                                                                                                                  | # Patients   | Efficacy Readout                                                                                        | Clinical responses                                              | Most Common AE                                      | Reference |
|----------------------------|------------------|--------------------------------------------------------------------------------------------------------------------------------------------|--------------|---------------------------------------------------------------------------------------------------------|-----------------------------------------------------------------|-----------------------------------------------------|-----------|
| CHRYSA-LIS (NCT02609776)   | Amivantamab      | Study of Amivantamab, a Human Bispecific EGFR and cMet Antibody, in Participants With Advanced Non-Small Cell Lung Cancer                  | 81 patients  | ORR 40% (95% CI, 29-51)<br>DOR 11.1 months (95% CI, 6.9-NR)<br>median PFS 8.3 months (95% CI, 6.5-10.9) | 3 CR, 29 PR, 39 SD, 2 NE                                        | Rash (98%)<br>IRR (66%)<br>Paronychia (45%)         | 46        |
| CHRYSA-LIS-2 (NCT04077463) | Amivantamab      | A Study of Lazertinib as Monotherapy or in Combination With Amivantamab in Participants With Advanced Non-small Cell Lung Cancer           | 45 patients  | ORR 36% (95% CI, 22-51)<br>DOR 9.6 months (95% CI, 5.3-NR)<br>median PFS 4.9 months (95% CI, 3.7-9.5)   | 1 CR, 15 PR                                                     | IRR (78%)<br>Rash (78%)<br>Paronychia (49%)         | 47        |
| NCT02892123                | Zanidatamab      | Trial of ZW25 (Zanidatamab) in Patients With Advanced HER2-expressing Cancers                                                              | 20 patients  | ORR 47% (95% CI, 23-72)<br>DOR 6.6 months (95% CI, 3.2-NE)                                              | NA                                                              | Diarrhea (45%)<br>IRR (30%)                         | 51        |
| NCT03619681                | KN026            | Trial of KN026 in Patients With HER2-positive Advanced Malignant Breast Cancer and Gastric Cancer                                          | 62 patients  | ORR 32.1% (95% CI, 20.3-46)<br>DCR 76.8% (95% CI 63.6-87)                                               | NA                                                              | Fever (23.8%)<br>Diarrhea (19%)                     | 54        |
| NCT03925974                | KN026            | KN026 in Patients With HER2 Expressing Gastric/Gastroesophageal Junction Cancer                                                            | 18 patients  | ORR 55.6% (10/18)<br>DCR 72.2% (13/18)                                                                  | NA                                                              | Transaminase increase (26%)<br>Rash (19%)           | 55        |
| NCT03321981                | Zenocutuzumab    | MCLA-128 With Trastuzumab/Chemotherapy in HER2+ and With Endocrine Therapy in ER+ and Low HER2 Breast Cancer                               | 26 patients  | DCR 77% (90% CI, 60-89) cohort 1                                                                        | 1 CR, 4 PR (2 unconfirmed)                                      | Neutropenia (61%)<br>Diarrhea (61%)                 | 59        |
| NCT03321981                | Zenocutuzumab    | MCLA-128 With Trastuzumab/Chemotherapy in HER2+ and With Endocrine Therapy in ER+ and Low HER2 Breast Cancer                               | 42 patients  | DCR 45% (90% CI, 32-59) cohort 2                                                                        | 2 PR (unconfirmed), 19 SD                                       | Fatigue (27%)<br>Diarrhea (25%)                     | 60        |
| NCT02912949                | Zenocutuzumab    | A Study of Zenocutuzumab (MCLA-128) in Patients With Solid Tumors Harboring an NRG1 Fusion                                                 | 51 patients  | ORR 27% (90% CI, 15-43)                                                                                 | NA                                                              | NA                                                  | 62        |
| NCT03330561                | Cinrebafusp alfa | PRS-343 in HER2-Positive Solid Tumors                                                                                                      | 33 patients  | ORR 12% (40% at/above doses of 8mg/kg)<br>DCR 52% (70% at/above doses of 8mg/kg)                        | 3% CR, 9% PR, 40% SD<br>10% CR, 30% PR at/above doses of 8mg/kg | IRR (25%)<br>Nausea (7%)                            | 65        |
| NCT00836654                | Catumaxomab      | Study in EpCAM Positive Patients With Symptomatic Malignant Ascites Using Removab Versus an Untreated Control Group                        | 258 patients | Puncture-free survival 46 vs 11 days (p<.0001)<br>Time-to-next paracentesis 77 vs 11 days (p<.0001)     | NA                                                              | Fever (60.5%)<br>Abdominal pain (43%)               | 69, 70    |
| NCT03529526                | KN046            | Study of the Safety, Tolerability, Pharmacokinetics, Immunogenicity and Antitumor Activity of KN046 in Subjects With Advanced Solid Tumors | 25 patients  | ORR 12% (3/25)<br>DCR 52%<br>median PFS 2.69 months (95% CI, 1.3-5.5)                                   | NA                                                              | Pruritus (27.6%)<br>Rash (27.6%)<br>Fatigue (20.7%) | 72        |
| NCT03872791                | KN046            | A Study of KN046 in Subjects With Locally Advanced or                                                                                      | 27 patients  | median PFS 7.3 months (4.04-NE)                                                                         | NA                                                              | Transaminase increase (48%)                         | 73        |

|             |             | Metastatic Triple-negative Breast Cancer                                                                                                                       |             |                            | Fever (33%) |                               |    |
|-------------|-------------|----------------------------------------------------------------------------------------------------------------------------------------------------------------|-------------|----------------------------|-------------|-------------------------------|----|
| NCT03852251 | Cadonilimab | A Study of AK104, a PD-1/CTLA-4 Bispecific Antibody, for Advanced Solid Tumors or With mXELOX as First-line Therapy for Advanced Gastric or GEJ Adenocarcinoma | 34 patients | ORR 66.7% (95% CI, 45-84)  | 2 CR, 14 PR | Neutropenia (26.5%)           | 75 |
|             |             |                                                                                                                                                                |             | DCR 95.8% (95% CI, 79-100) |             | IRR (17.6%)                   |    |
| NCT04444167 | Cadonilimab | A Study of Anti-PD-1/CTLA-4 Bispecific AK104 Plus Lenvatinib in First-line Advanced Hepatocellular Carcinoma                                                   | 18 patients | ORR 44% (8/18)             | NA          | Transaminase increase (36.7%) | 76 |
|             |             |                                                                                                                                                                |             | DCR 78% (14/18)            |             | Thrombocytopenia (33%)        |    |

**Table S2. Early Clinical Results of bsAbs in Solid Cancer.** Table showing patient characteristics, objective clinical responses and safety parameters of the most representative clinical trials investigating bsAb agents in solid malignancies. Abbreviations: Not Available, NA; Not Estimable, NE; Not Reached, NR; Overall Response Rate, ORR; Disease Control Rate, DCR; Duration of Response, DOR; Adverse Event, AE; Infusion Related Reaction, IRR; Complete Response, CR; Partial Response, PR; Stable Disease, SD.
